# Supplementary material for: Bridged bis-BODIPYs: their synthesis, structures and properties
Source: Royal Society of Chemistry journal article supplement (doi:10.1039/c5dt01925g), 2015-01-01
Supplement: c5dt01925g1.pdf [file c5dt01925g1.pdf]

## Bridged Bis-BODIPYs: Synthesis, Structures and Properties

Praseetha E. Kesavan,<sup>†</sup> Sudipta Das,<sup>†</sup> Mohsin Y. Lone,<sup>‡</sup> Prakash C. Jha,<sup>‡</sup> Shigeki Mori<sup>§</sup> and Iti Gupta<sup>\*†</sup>

<sup>†</sup>\*Correspondence to: Dr. Iti Gupta, Indian Institute of Technology Gandhinagar, VGEC Campus, Chandkheda, Ahmedabad-382424, India. Phone: +91-9925479623, Fax: +91-23972324, E-mail: [iti@iitgn.ac.in](mailto:iti@iitgn.ac.in)

<sup>‡</sup>School of Chemical Sciences, Central University of Gujarat, Gandhinagar, Gujarat, India

<sup>§</sup>Integrated Centre for Sciences, Ehime University, Matsuyama 790-8577, Japan

### List of contents

|                                                                                                |              |
|------------------------------------------------------------------------------------------------|--------------|
| <b>Synthesis of Bis-aldehydes</b>                                                              | <b>S4-S5</b> |
| <b>Figure 1:</b> HRMS spectrum of Bis-dipyrrane <b>7</b> .                                     | <b>S6</b>    |
| <b>Figure 2:</b> <sup>1</sup> H NMR spectrum of Bis-dipyrrane <b>7</b> in CDCl <sub>3</sub> .  | <b>S7</b>    |
| <b>Figure 3:</b> HRMS spectrum of Bis-dipyrrane <b>8</b> .                                     | <b>S8</b>    |
| <b>Figure 4:</b> <sup>1</sup> H NMR spectrum of Bis-dipyrrane <b>8</b> in CDCl <sub>3</sub> .  | <b>S8</b>    |
| <b>Figure 5:</b> HRMS spectrum of Bis-dipyrrane <b>9</b> .                                     | <b>S9</b>    |
| <b>Figure 6:</b> <sup>1</sup> H NMR spectrum of Bis-dipyrrane <b>9</b> in CDCl <sub>3</sub> .  | <b>S10</b>   |
| <b>Figure 7:</b> HRMS spectrum of Bis-dipyrrane <b>10</b> .                                    | <b>S11</b>   |
| <b>Figure 8:</b> <sup>1</sup> H NMR spectrum of Bis-dipyrrane <b>10</b> in CDCl <sub>3</sub> . | <b>S11</b>   |
| <b>Figure 9:</b> HRMS spectrum of Bis-BODIPY <b>1</b> .                                        | <b>S12</b>   |
| <b>Figure 10:</b> <sup>1</sup> H NMR spectrum of Bis-BODIPY <b>1</b> in CDCl <sub>3</sub> .    | <b>S13</b>   |
| <b>Figure 11:</b> <sup>13</sup> C NMR spectrum of Bis-BODIPY <b>1</b> in CDCl <sub>3</sub> .   | <b>S13</b>   |
| <b>Figure 12:</b> <sup>19</sup> F NMR spectrum of Bis-BODIPY <b>1</b> in CDCl <sub>3</sub> .   | <b>S14</b>   |
| <b>Figure 13:</b> <sup>11</sup> B NMR spectrum of Bis-BODIPY <b>1</b> in CDCl <sub>3</sub> .   | <b>S14</b>   |
| <b>Figure 14:</b> HRMS spectrum of Bis-BODIPY <b>2</b> .                                       | <b>S15</b>   |
| <b>Figure 15:</b> <sup>1</sup> H NMR spectrum of Bis-BODIPY <b>2</b> in CDCl <sub>3</sub> .    | <b>S16</b>   |
| <b>Figure 16:</b> <sup>13</sup> C NMR spectrum of Bis-BODIPY <b>2</b> in CDCl <sub>3</sub> .   | <b>S16</b>   |
| <b>Figure 17:</b> <sup>19</sup> F NMR spectrum of Bis-BODIPY <b>2</b> in CDCl <sub>3</sub> .   | <b>S17</b>   |
| <b>Figure 18:</b> <sup>11</sup> B NMR spectrum of Bis-BODIPY <b>2</b> in CDCl <sub>3</sub> .   | <b>S17</b>   |

|                                                                                              |            |
|----------------------------------------------------------------------------------------------|------------|
| <b>Figure 19:</b> HRMS spectrum of Bis-BODIPY <b>3</b> .                                     | <b>S18</b> |
| <b>Figure 20:</b> <sup>1</sup> H NMR spectrum of Bis-BODIPY <b>3</b> in CDCl <sub>3</sub> .  | <b>S19</b> |
| <b>Figure 21:</b> <sup>13</sup> C NMR spectrum of Bis-BODIPY <b>3</b> in CDCl <sub>3</sub> . | <b>S19</b> |
| <b>Figure 22:</b> <sup>19</sup> F NMR spectrum of Bis-BODIPY <b>3</b> in CDCl <sub>3</sub> . | <b>S20</b> |
| <b>Figure 23:</b> <sup>11</sup> B NMR spectrum of Bis-BODIPY <b>3</b> in CDCl <sub>3</sub> . | <b>S20</b> |
| <b>Figure 24:</b> HRMS spectrum of Bis-BODIPY <b>4</b> .                                     | <b>S21</b> |
| <b>Figure 25:</b> <sup>1</sup> H NMR spectrum of Bis-BODIPY <b>4</b> in CDCl <sub>3</sub> .  | <b>S22</b> |
| <b>Figure 26:</b> <sup>13</sup> C NMR spectrum of Bis-BODIPY <b>4</b> in CDCl <sub>3</sub> . | <b>S22</b> |
| <b>Figure 27:</b> <sup>19</sup> F NMR spectrum of Bis-BODIPY <b>4</b> in CDCl <sub>3</sub> . | <b>S23</b> |
| <b>Figure 28:</b> <sup>11</sup> B NMR spectrum of Bis-BODIPY <b>4</b> in CDCl <sub>3</sub> . | <b>S23</b> |
| <b>Figure 29:</b> HRMS spectrum Bis-BODIPY <b>5</b> .                                        | <b>S24</b> |
| <b>Figure 30:</b> <sup>1</sup> H NMR spectrum Bis-BODIPY <b>5</b> in CDCl <sub>3</sub> .     | <b>S25</b> |
| <b>Figure 31:</b> <sup>13</sup> C NMR spectrum of Bis-BODIPY <b>5</b> in CDCl <sub>3</sub> . | <b>S25</b> |
| <b>Figure 32:</b> <sup>19</sup> F NMR spectrum of Bis-BODIPY <b>5</b> in CDCl <sub>3</sub> . | <b>S26</b> |
| <b>Figure 33:</b> <sup>11</sup> B NMR spectrum of Bis-BODIPY <b>5</b> in CDCl <sub>3</sub> . | <b>S26</b> |
| <b>Figure 34:</b> HRMS spectrum Bis-BODIPY <b>5</b> .                                        | <b>S27</b> |
| <b>Figure 35:</b> <sup>1</sup> H NMR spectrum of Bis-BODIPY <b>6</b> in CDCl <sub>3</sub> .  | <b>S28</b> |
| <b>Figure 36:</b> <sup>13</sup> C NMR spectrum of Bis-BODIPY <b>6</b> in CDCl <sub>3</sub> . | <b>S28</b> |
| <b>Figure 37:</b> <sup>19</sup> F NMR spectrum of Bis-BODIPY <b>6</b> in CDCl <sub>3</sub> . | <b>S29</b> |
| <b>Figure 38:</b> <sup>11</sup> B NMR spectrum of Bis-BODIPY <b>6</b> in CDCl <sub>3</sub> . | <b>S29</b> |
| <b>Figure 39:</b> UV-Vis spectra of Bis- BODIPY <b>1</b> in different solvents.              | <b>S30</b> |
| <b>Figure 40:</b> UV-Vis spectra of Bis- BODIPY <b>2</b> in different solvents.              | <b>S30</b> |
| <b>Figure 41:</b> UV-Vis spectra of Bis- BODIPY <b>3</b> in different solvents.              | <b>S31</b> |
| <b>Figure 42:</b> UV-Vis spectra of Bis- BODIPY <b>4</b> in different solvents.              | <b>S31</b> |
| <b>Figure 43:</b> UV-Vis spectra of Bis- BODIPY <b>5</b> in different solvents.              | <b>S22</b> |
| <b>Figure 44:</b> UV-Vis spectra of Bis- BODIPY <b>6</b> in different solvents.              | <b>S32</b> |
| <b>Figure 45:</b> Steady state fluorescence spectra of Bis- BODIPY <b>1</b>                  |            |

|                                                                                                |         |
|------------------------------------------------------------------------------------------------|---------|
| in different solvents.                                                                         | S33     |
| <b>Figure 46:</b> Steady state fluorescence spectra of Bis- BODIPY 2<br>in different solvents. | S33     |
| <b>Figure 47:</b> Steady state fluorescence spectra of Bis- BODIPY 3<br>in different solvents. | S34     |
| <b>Figure 48:</b> Steady state fluorescence spectra of Bis- BODIPY 4<br>in different solvents  | S34     |
| <b>Figure 49:</b> Steady state fluorescence spectra of Bis- BODIPY 5<br>in different solvents. | S35     |
| <b>Figure 50:</b> Steady state fluorescence spectra of Bis- BODIPY 6<br>in different solvents. | S35     |
| <b>Figure 51:</b> TCSPC of Bis- BODIPY 5 and 6 in Dichloromethane.                             | S36     |
| <b>Figure 52:</b> Packing diagram and $\pi$ - $\pi$ stacking diagram of Bis -BODIPY 4.         | S37     |
| <b>Table 1:</b> Crystal data refinement parameters of Bis-BODIPYs 1, 2 and 4.                  | S38     |
| <b>DFT calculation data</b>                                                                    | S38-S41 |

## Synthesis of bis aldehydes

### Synthesis of triphenylamine bis-aldehyde

Phosphoryl chloride (9.5 mL, 101.9 mmol) was added slowly to dry DMF (7.3 mL, 94.3 mmol) at 0°C and the mixture was stirred for 1 hr at RT and then a solution of triphenylamine (1 g, 4.1 mmol) in dichloroethane was added and stirred for 1 h. After this, the reaction mixture was refluxed for 15h. Finally the solution was cooled and poured into water. The organic layer was extracted with dichloromethane, dried with sodium sulphate and the solvent was removed under reduced pressure. The desired compound was isolated via silica gel column chromatography using a mixture of ethyl acetate/hexane (10:90). Yield: 45 % (550mg). <sup>1</sup>H NMR (500 MHz, CDCl<sub>3</sub>, δ ppm): 9.89 (s, 2H), 7.77 (d, *J* = 9 Hz, 4H, Ar-H), 7.40 (t, *J* = 8 Hz, 2H, Ar-H), 7.18 (m, 6H, Ar-H).

### Synthesis of bis-formyl thiophene<sup>S1</sup>

In an oven dried 250 mL 2 neck RB, Thiophene (1 mL, 12.479 mmol) was added and is dissolved in 40 mL dry hexane. After 5 min. TMEDA (2 mL) was added and stirred for 5 min at room temperature. After 5 min. n-BuLi (75 mL) was added and the reaction mixture is refluxed for 3h after stirring at room temperature for 10 min. After 3h, the reaction mixture is cooled to room temperature and then cooled to -40°C and added dry THF (60 ML) and DMF (2.5 mL) and allowed the reaction mixture to come into room temperature naturally. Then the reaction is quenched by adding water and extracted the organic layer with ethyl acetate. Organic layer was separated and dried over Na<sub>2</sub>SO<sub>4</sub> and concentrated over rotary evaporator. The crude residue was purified in wet column chromatography and eluted the desired compound using ethyl acetate: Hexane (95: 5) mixture to yield 30% (524.08 mg) of bis-formyl thiophene.. <sup>1</sup>H NMR (500 MHz, CDCl<sub>3</sub>, δ ppm): 10.043 (s, 2H), 7.843(s, 2H).

### Synthesis of bis-formyl furan

Taken an oven dried 250 mL two neck RB and added 1 mL of furan in 40 mL dry hexane under nitrogen atmosphere. After 5 min, added 6mL TMEDA and stirred for 5 min at room temperature. After 5 min. n-BuLi (24 mL) was added and allowed to stir in RT for another 10 min. After 10 minutes, allowed the reaction mixture to reflux. After reflexing for 3 h, reaction mixture is cooled to RT. After 10 min the reaction mixture is cooled to -10°C and added THF (20 mL) followed by DMF (2.7 mL) and allowed the reaction mixture to come in room temperature. The reaction is quenched by adding water and separated the organic layer and

washed with water. Collected the organic layer by adding ethyl acetate dried over  $\text{Na}_2\text{SO}_4$  and concentrated over rotary evaporator. The crude residue was dissolved in small amount of dichloromethane and purified by column chromatography on silica gel (ethyl acetate/hexane = 5: 95) to yield 25 % (425 mg) of bis formyl furan.  $^1\text{H}$  NMR (500 MHz,  $\text{CDCl}_3$ ,  $\delta$  ppm): 9.868 (s, 2H), 7.341 (s, 2H).

### Reference

S1) G. M. Xia, P. Lu and S. Q. Liu, *Acta Chim. Slov.* 2005, **52**, 336.

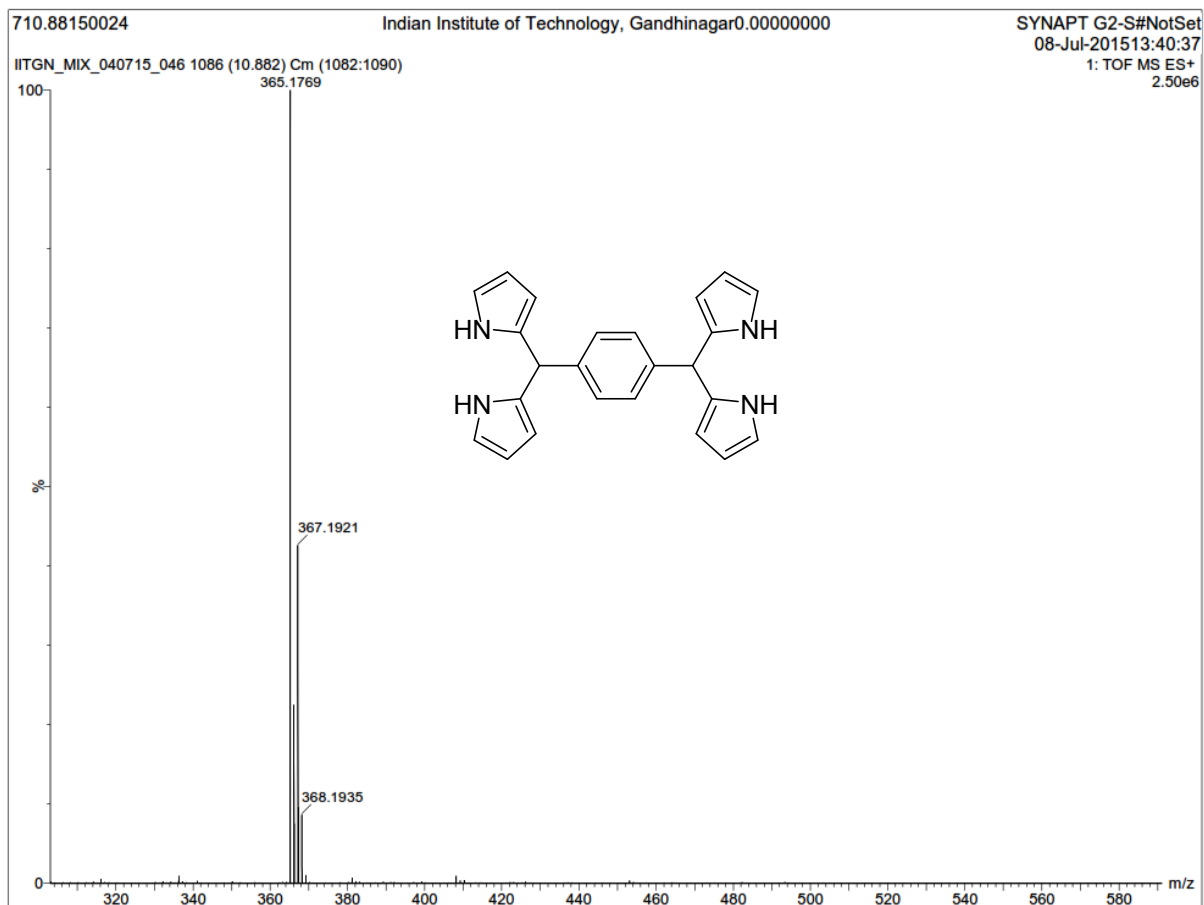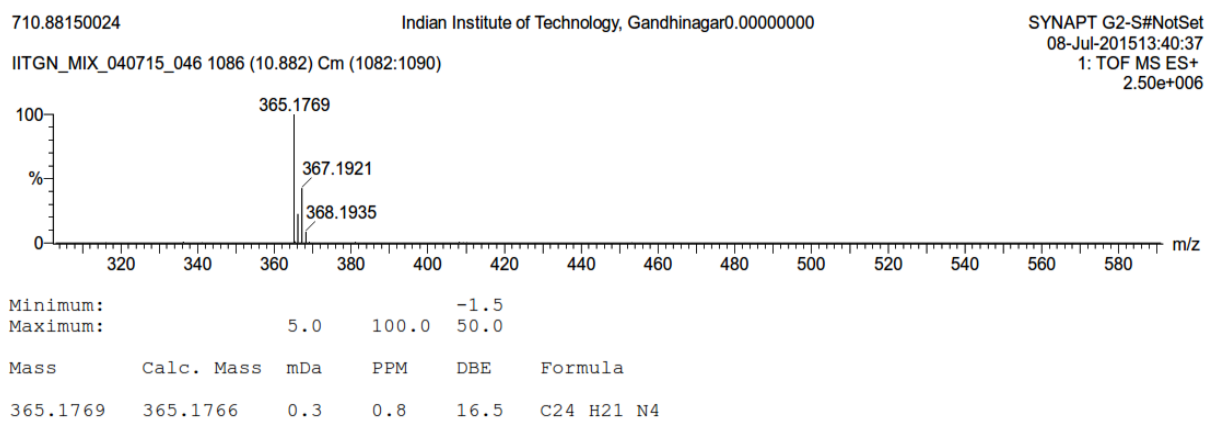

**Figure 1:** HRMS spectrum of Bis-dipyrane 7.

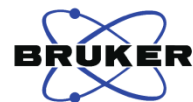

Current Data Parameters  
NAME praseetha  
EXPNO 274  
PROCNO 1

F2 - Acquisition Parameters  
Date\_ 20140328  
Time 10.01  
INSTRUM spect  
PROBHD 5 mm PABBO BB/  
PULPROG zg30  
TD 65536  
SOLVENT CDCl3  
NS 400  
DS 2  
SWH 10000.000 Hz  
FIDRES 0.152588 Hz  
AQ 3.2767999 sec  
RG 200.08  
DW 50.000 usec  
DE 6.50 usec  
TE 299.8 K  
D1 1.00000000 sec  
TD0 1

===== CHANNEL f1 =====  
SF01 500.0930883 MHz  
NUC1 1H  
P1 12.15 usec  
PLW1 17.00000000 W

F2 - Processing parameters  
SI 65536  
SF 500.090170 MHz  
WDW EM  
SSB 0  
LB 0.30 Hz  
GB 0  
PC 1.00

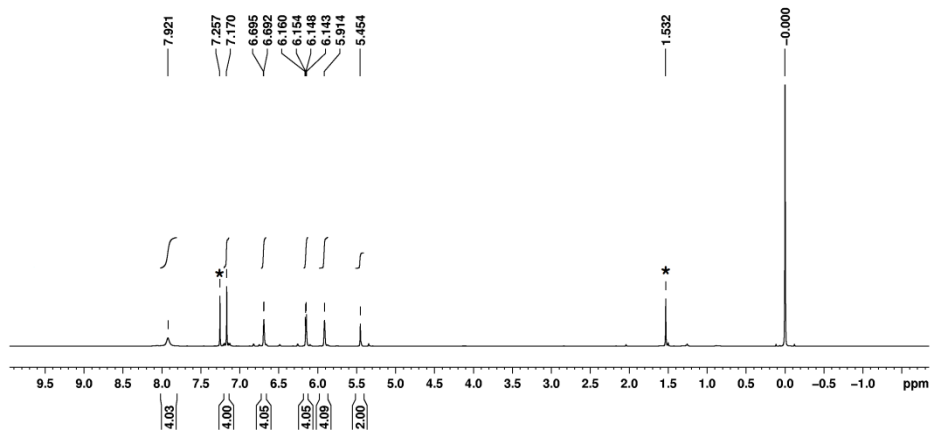

Figure 2:  $^1\text{H}$  NMR spectrum of Bis-dipyrrene **7** in  $\text{CDCl}_3$ .

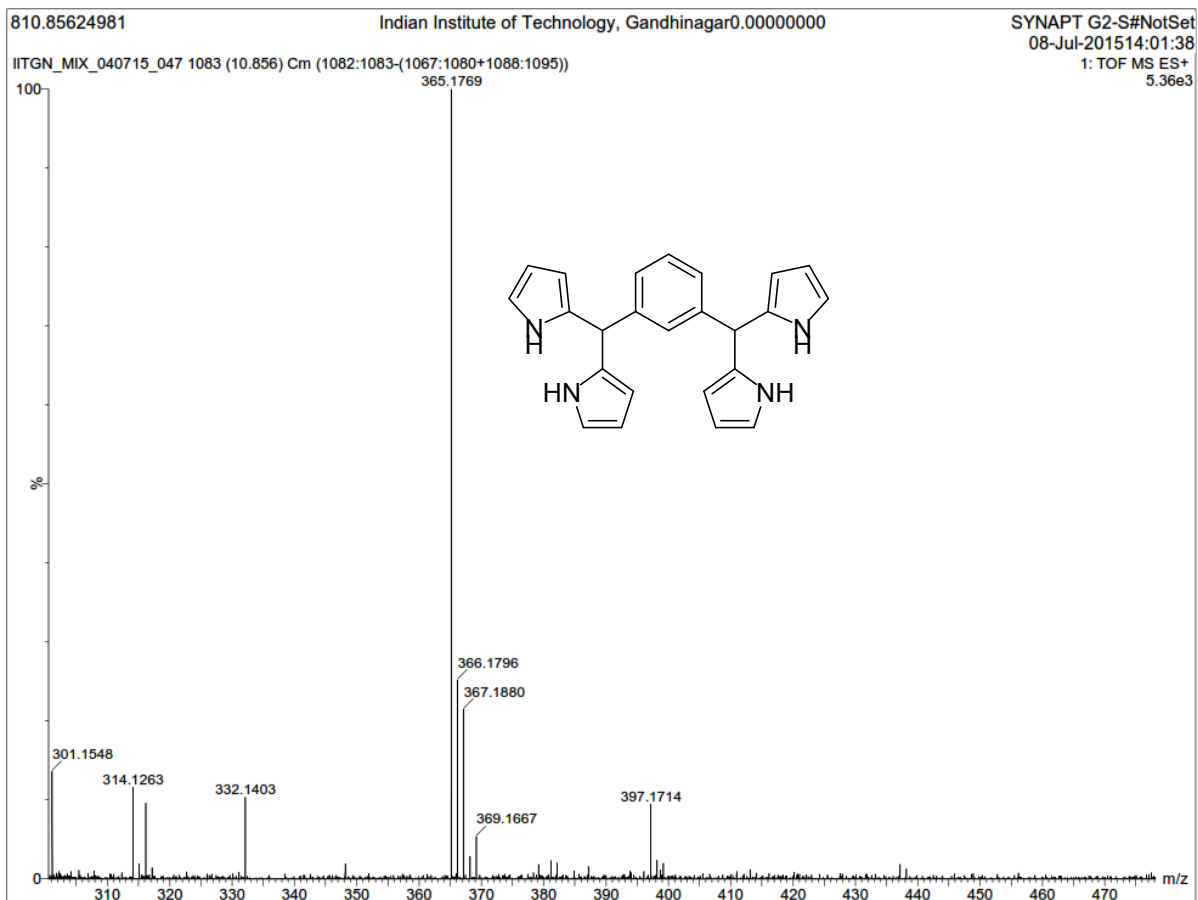

810.85624981

Indian Institute of Technology, Gandhinagar0.0000000

SYNAPT G2-S#NotSet

08-Jul-201514:01:38

IITGN\_MIX\_040715\_047 1083 (10.856) Cm (1082:1083-(1067:1080+1088:1095))

1: TOF MS ES+  
5.36e+003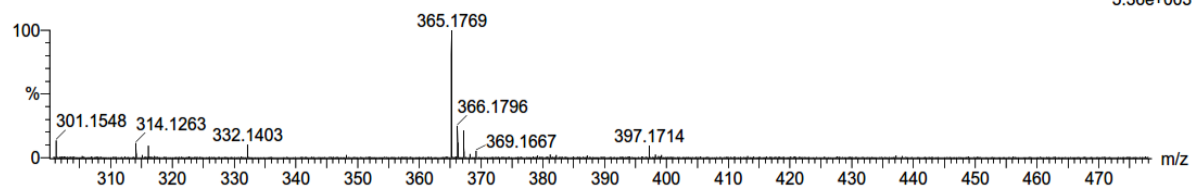

|          |            |       |      |      |            |
|----------|------------|-------|------|------|------------|
| Minimum: |            |       | -1.5 |      |            |
| Maximum: | 5.0        | 100.0 | 50.0 |      |            |
| Mass     | Calc. Mass | mDa   | PPM  | DBE  | Formula    |
| 365.1769 | 365.1766   | 0.3   | 0.8  | 16.5 | C24 H21 N4 |

**Figure 3:** HRMS spectrum of Bis-dipyrrane **8**.

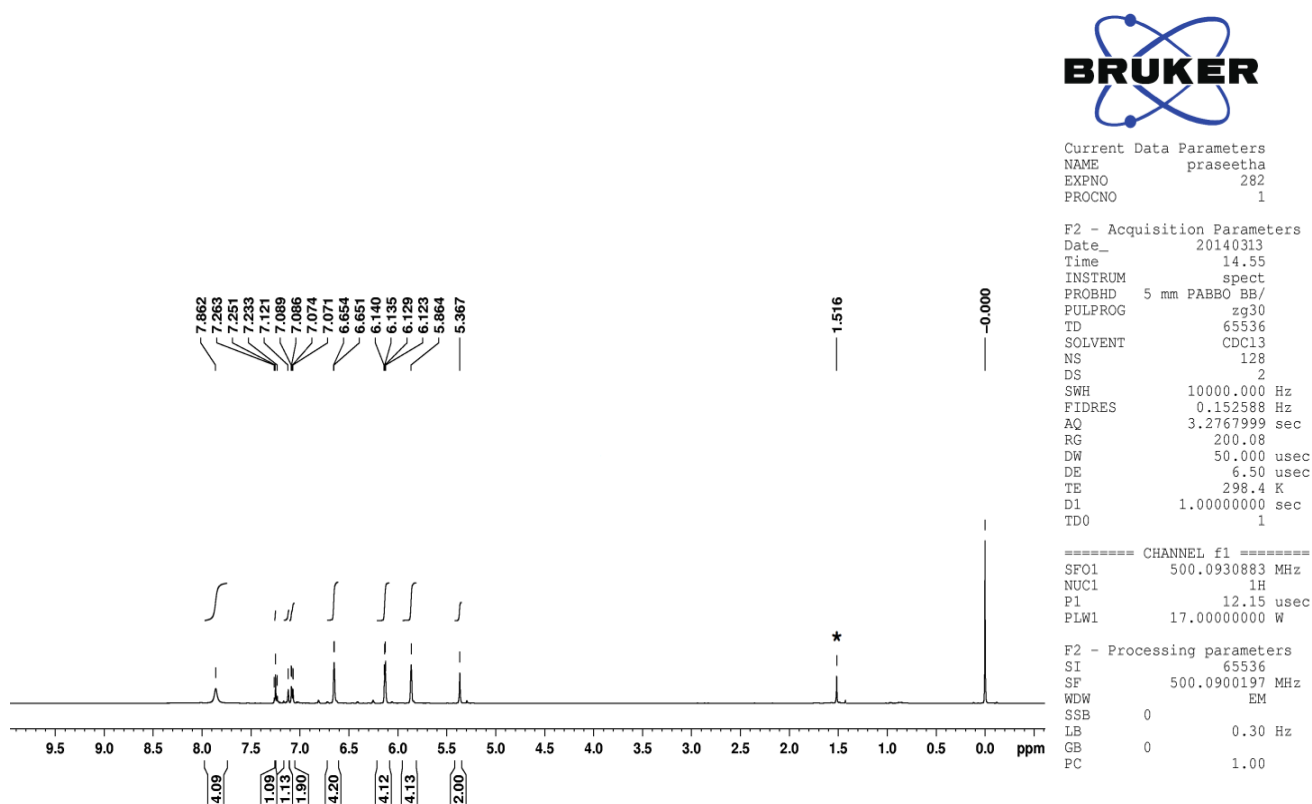

**Figure 4:**  $^1\text{H}$  NMR spectrum of Bis-dipyrrane **8** in  $\text{CDCl}_3$ .



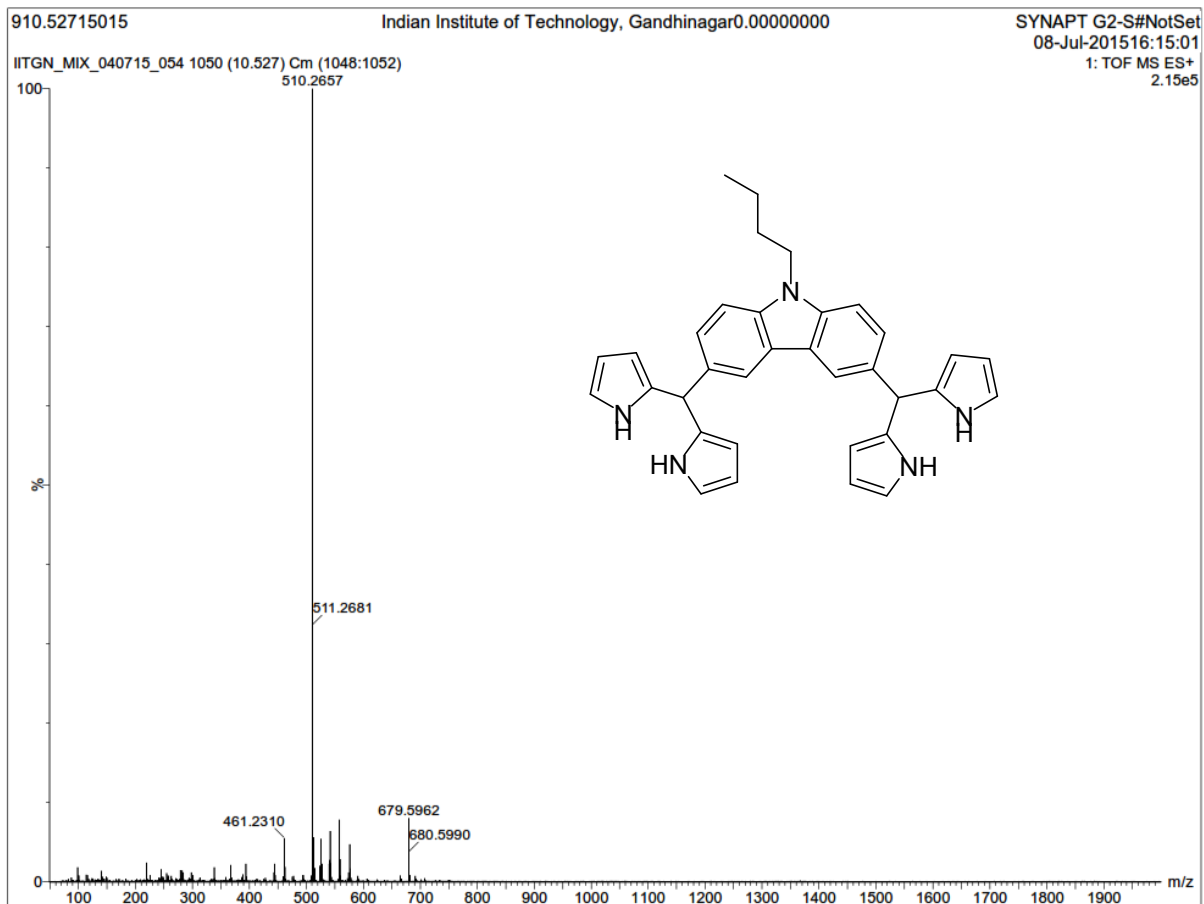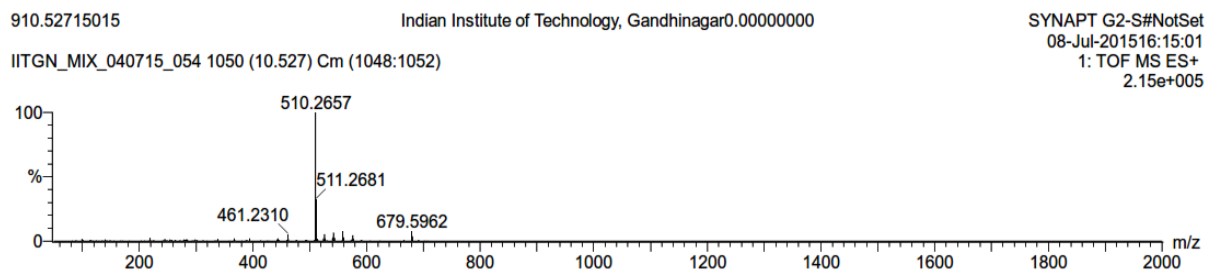

| Mass     | Calc. Mass | mDa  | PPM  | DBE  | Formula                                        |
|----------|------------|------|------|------|------------------------------------------------|
| 510.2657 | 510.2658   | -0.1 | -0.2 | 21.5 | C <sub>34</sub> H <sub>32</sub> N <sub>5</sub> |

**Figure 5:** HRMS spectrum of Bis-dipyrane 9.

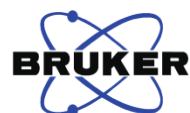

Current Data Parameters  
NAME sudipta  
EXPNO 316  
PROCNO 1

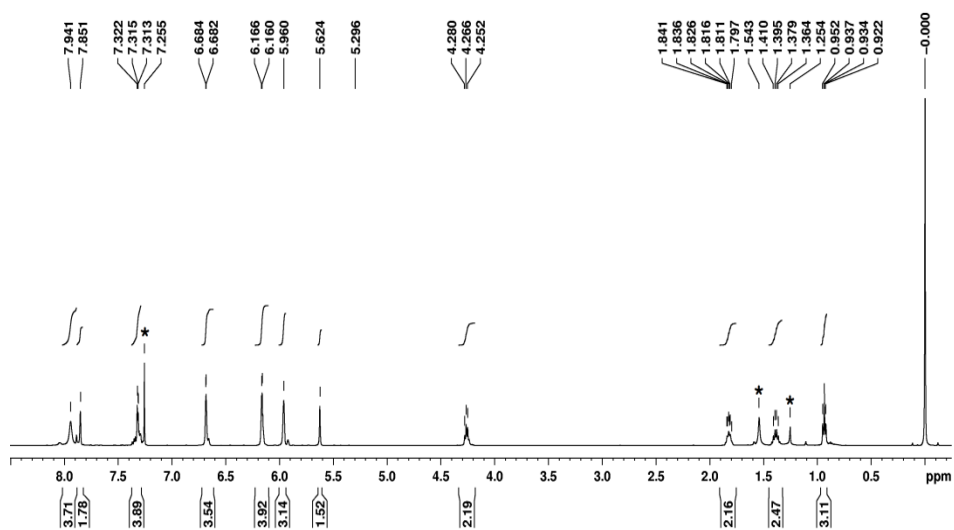

F2 - Acquisition Parameters  
Date\_ 20140403  
Time 18.54  
INSTRUM spect  
PROBHD 5 mm PABBO BB/  
PULPROG zg30  
TD 65536  
SOLVENT CDCl3  
NS 128  
DS 2  
SWH 10000.000 Hz  
FIDRES 0.152588 Hz  
AQ 3.2767999 sec  
RG 200.08  
DW 50.000 usec  
DE 6.50 usec  
TE 296.3 K  
D1 1.00000000 sec  
TDO 1

==== CHANNEL f1 =====  
SF01 500.0930883 MHz  
NUC1 1H  
P1 12.15 usec  
PLW1 17.00000000 W

F2 - Processing parameters  
SI 65536  
SF 500.0900174 MHz  
WDW EM  
SSB 0  
LB 0.30 Hz  
GB 0  
PC 1.00

Figure 6: <sup>1</sup>H NMR spectrum of Bis-dipyrane 9 in CDCl<sub>3</sub>.

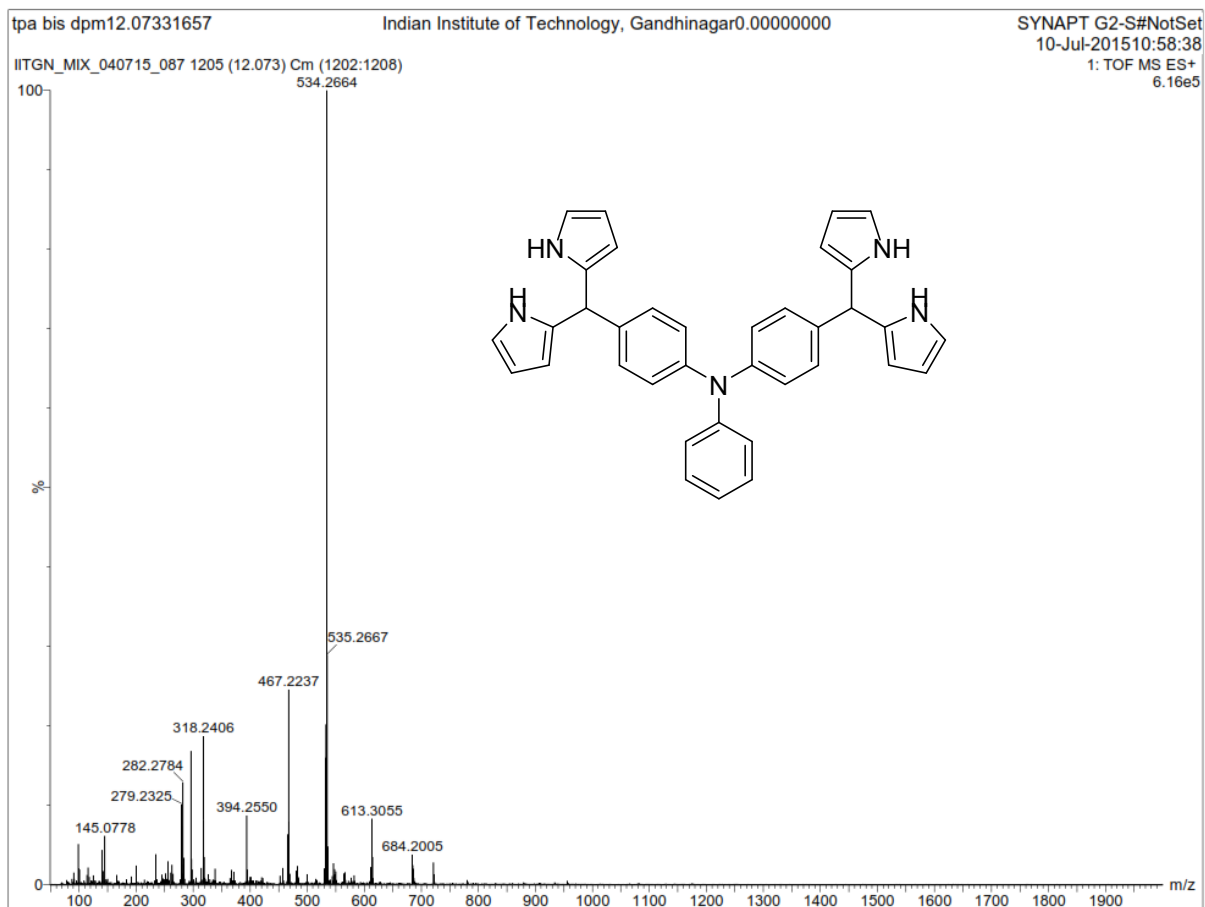

tpa bis dpm12.07331657

Indian Institute of Technology, Gandhinagar0.00000000

SYNAPT G2-S#NotSet  
10-Jul-201510:58:38  
1: TOF MS ES+  
6.16e+005

IITGN\_MIX\_040715\_087 1205 (12.073) Cm (1202:1208)

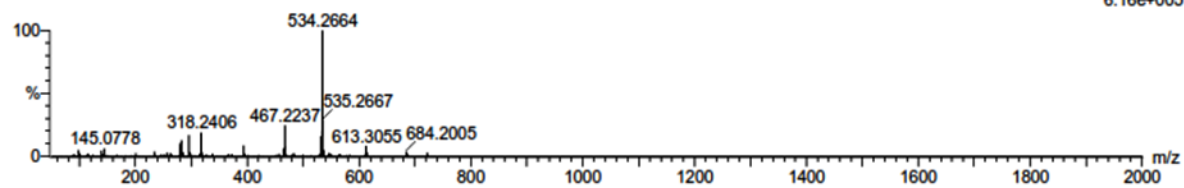

|          |            |     |       |      |            |
|----------|------------|-----|-------|------|------------|
| Minimum: |            |     |       |      | -1.5       |
| Maximum: |            | 5.0 | 100.0 | 50.0 |            |
| Mass     | Calc. Mass | mDa | PPM   | DBE  | Formula    |
| 534.2664 | 534.2658   | 0.6 | 1.1   | 23.5 | C36 H32 N5 |

Figure 7: HRMS spectrum of Bis-dipyrane 10.

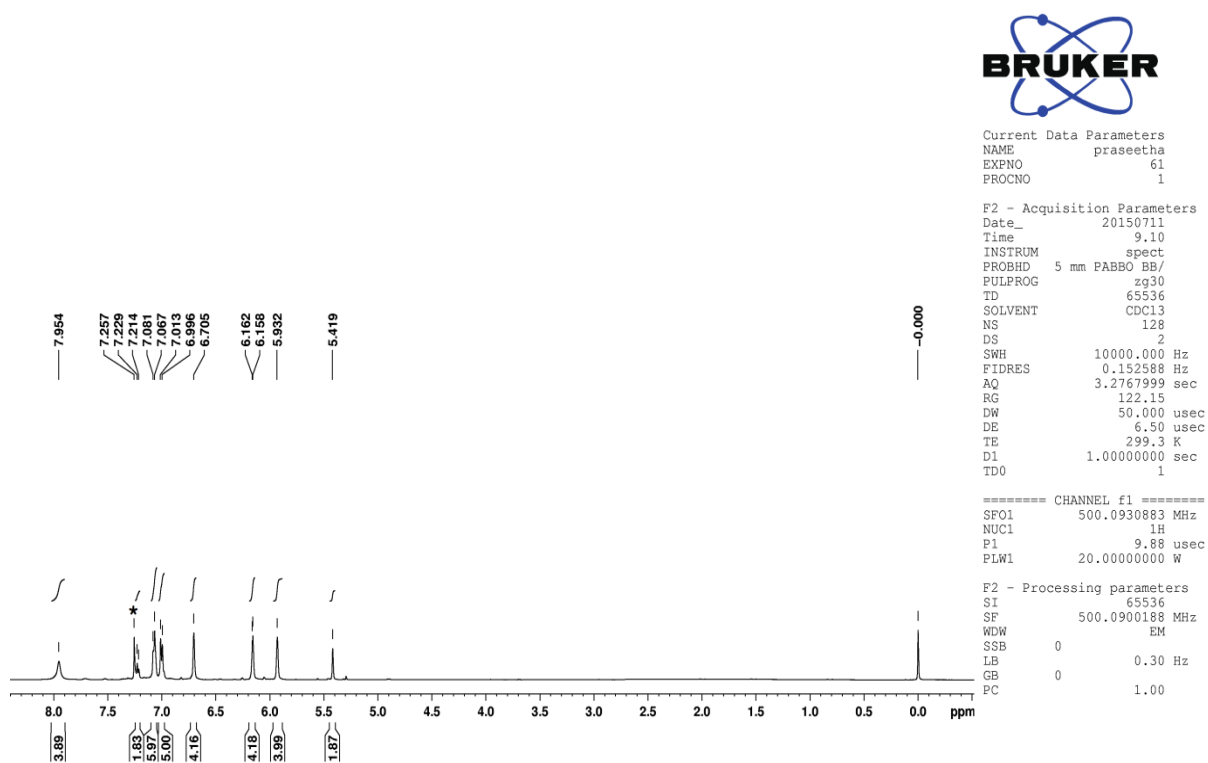

Figure 8: <sup>1</sup>H NMR spectrum of Bis-dipyrane 10 in CDCl<sub>3</sub>.

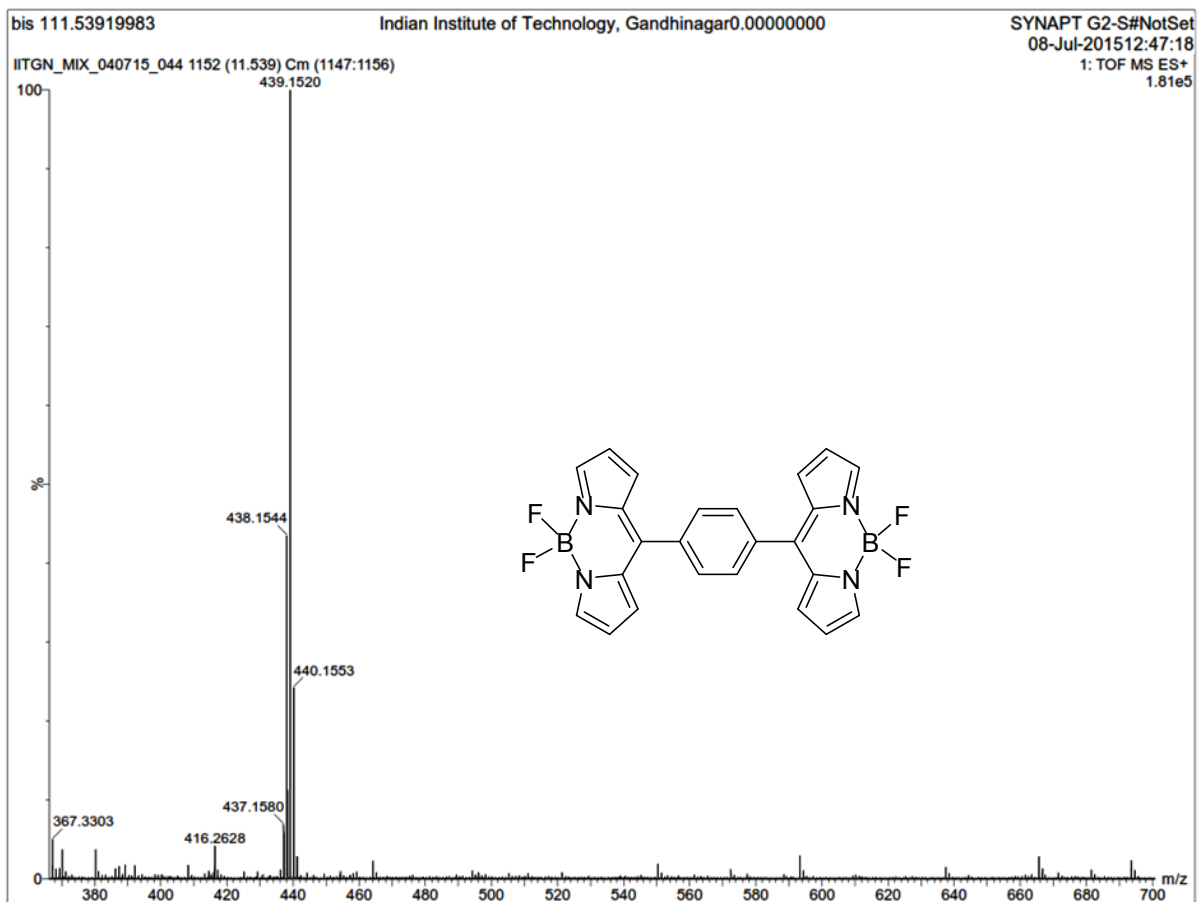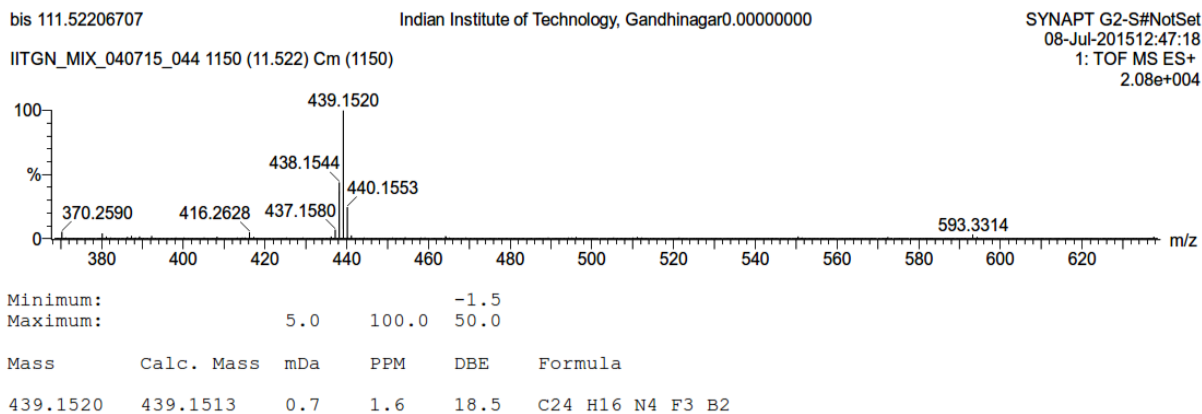

**Figure 9:** HRMS spectrum of Bis-BODIPY 1.

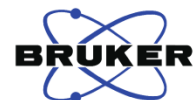

Current Data Parameters  
NAME praseetha  
EXPNO 84  
PROCNO 1

F2 - Acquisition Parameters  
Date\_ 20140404  
Time 16.15  
INSTRUM spect  
PROBHD 5 mm PABBO BB/  
PULPROG zg30  
TD 65536  
SOLVENT CDCl3  
NS 200  
DS 2  
SWH 10000.000 Hz  
FIDRES 0.152588 Hz  
AQ 3.2767999 sec  
RG 200.08  
DW 50.000 usec  
DE 6.50 usec  
TE 297.4 K  
D1 1.00000000 sec  
TD0 1

===== CHANNEL f1 =====  
SFO1 500.0930883 MHz  
NUC1 1H  
P1 12.15 usec  
PLW1 17.00000000 W

F2 - Processing parameters  
SI 65536  
SF 500.0900146 MHz  
WDW EM  
SSB 0  
LB 0.30 Hz  
GB 0  
PC 1.00

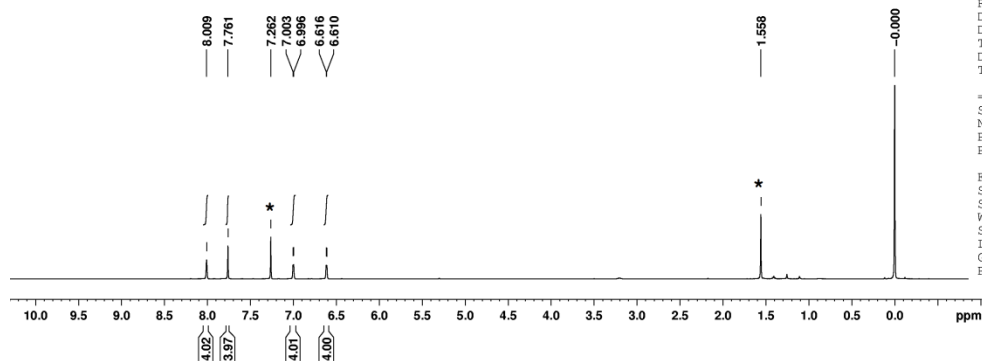

Figure 10:  $^1\text{H}$  NMR spectrum of Bis-BODIPY 1 in  $\text{CDCl}_3$ .

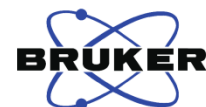

Current Data Parameters  
NAME praseetha  
EXPNO 8  
PROCNO 1

F2 - Acquisition Parameters  
Date\_ 20150616  
Time 14.20  
INSTRUM spect  
PROBHD 5 mm PABBO BB/  
PULPROG zgpg30  
TD 65536  
SOLVENT CDCl3  
NS 2914  
DS 4  
SWH 29761.904 Hz  
FIDRES 0.454131 Hz  
AQ 1.1010048 sec  
RG 200.08  
DW 16.800 usec  
DE 6.50 usec  
TE 299.8 K  
D1 2.00000000 sec  
D11 0.03000000 sec  
TD0 1

===== CHANNEL f1 =====  
SFO1 125.7603047 MHz  
NUC1 13C  
P1 8.50 usec  
PLW1 31.50000000 W

===== CHANNEL f2 =====  
SFO2 500.0920004 MHz  
NUC2 1H  
CPDPRG[2] waltz16  
PCPD2 80.00 usec  
PLW2 20.00000000 W  
PLW12 0.29707000 W  
PLW13 0.19013000 W

F2 - Processing parameters  
SI 32768  
SF 125.7477303 MHz  
WDW EM  
SSB 0  
LB 1.00 Hz  
GB 0  
PC 1.40

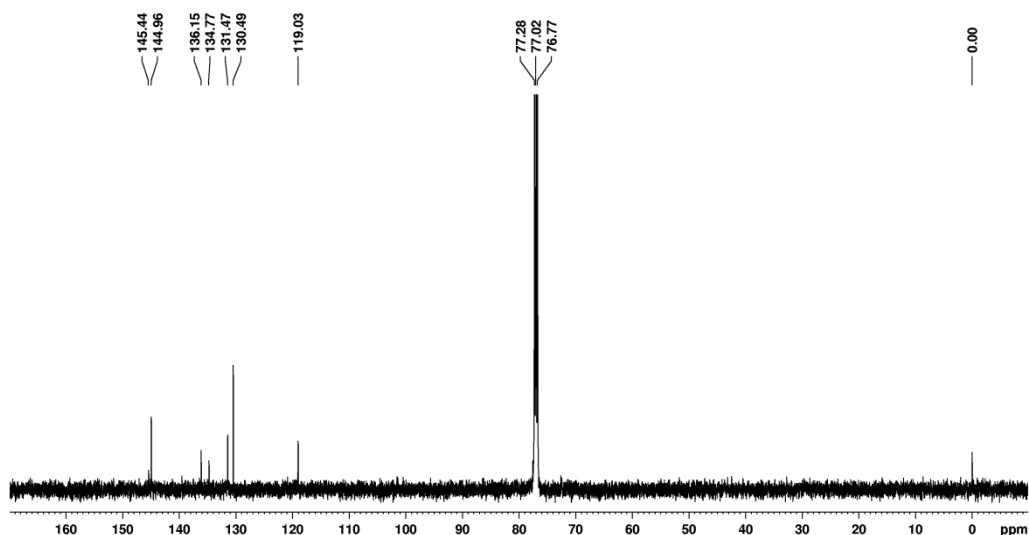

Figure 11:  $^{13}\text{C}$  NMR spectrum of Bis-BODIPY 1 in  $\text{CDCl}_3$ .

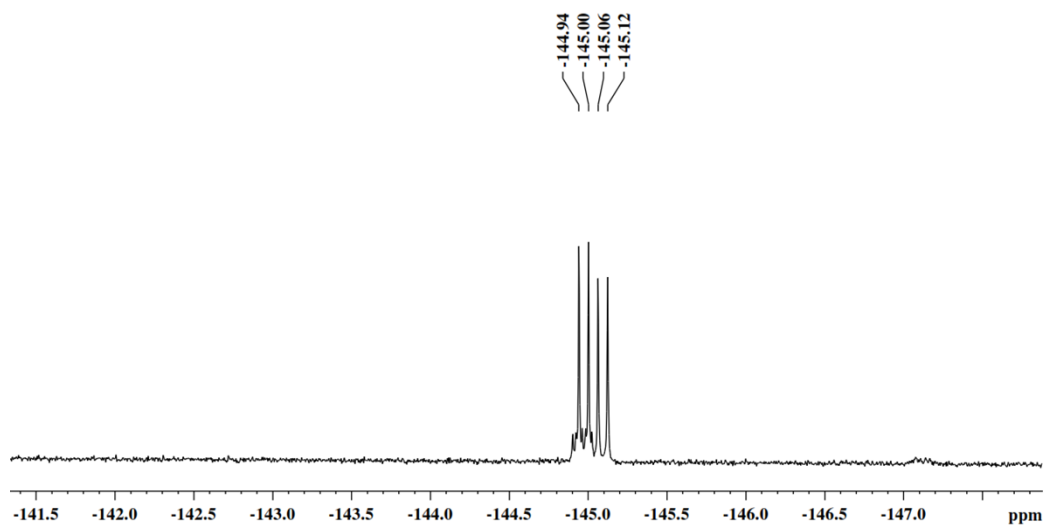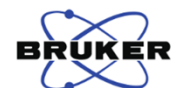

```

Current Data Parameters
NAME      praseetha
EXPNO     377
PROCNO    1

F2 - Acquisition Parameters
Date_     20140724
Time      15.34
INSTRUM   spect
PROBHD    5 mm PABBO BB/
PULPROG   zgfgn
TD         131072
SOLVENT   cdcl3
NS         128
DS         4
SWH        113636.367 Hz
FIDRES     0.866977 Hz
AQ         0.5767168 sec
RG         200.08
DW         4.400 usec
DE         6.50 usec
TE         302.7 K
D1         1.00000000 sec
TD0        1

===== CHANNEL f1 =====
SFO1      470.5076841 MHz
NUC1       19F
P1         11.00 usec
PLW1       35.48099899 W

F2 - Processing parameters
SI         65536
SF         470.5547400 MHz
WDW        EM
SSB        0
LB         0.30 Hz
GB         0
PC         1.00
  
```

**Figure 12:**  $^{19}\text{F}$  NMR spectrum of Bis-BODIPY 1 in  $\text{CDCl}_3$ .

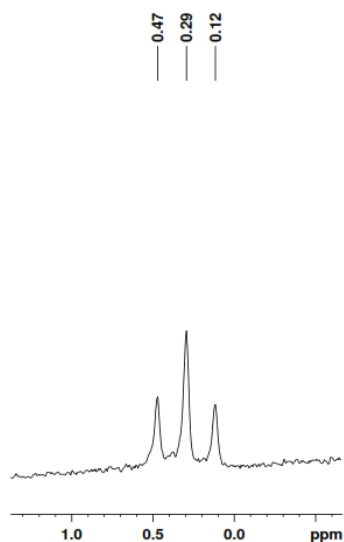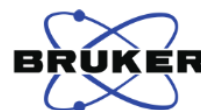

```

Current Data Parameters
NAME      praseetha
EXPNO     376
PROCNO    1

F2 - Acquisition Parameters
Date_     20140724
Time      15.29
INSTRUM   spect
PROBHD    5 mm PABBO BB/
PULPROG   zg
TD         65536
SOLVENT   CDC13
NS         128
DS         4
SWH        32051.281 Hz
FIDRES     0.489064 Hz
AQ         1.0223616 sec
RG         200.08
DW         15.600 usec
DE         6.50 usec
TE         302.8 K
D1         1.00000000 sec
TD0        1

===== CHANNEL f1 =====
SFO1      160.4487456 MHz
NUC1       11B
P1         9.00 usec
PLW1       30.00000000 W

F2 - Processing parameters
SI         32768
SF         160.4487460 MHz
WDW        EM
SSB        0
LB         1.00 Hz
GB         0
PC         1.40
  
```

**Figure 13:**  $^{11}\text{B}$  NMR spectrum of Bis-BODIPY 1 in  $\text{CDCl}_3$ .

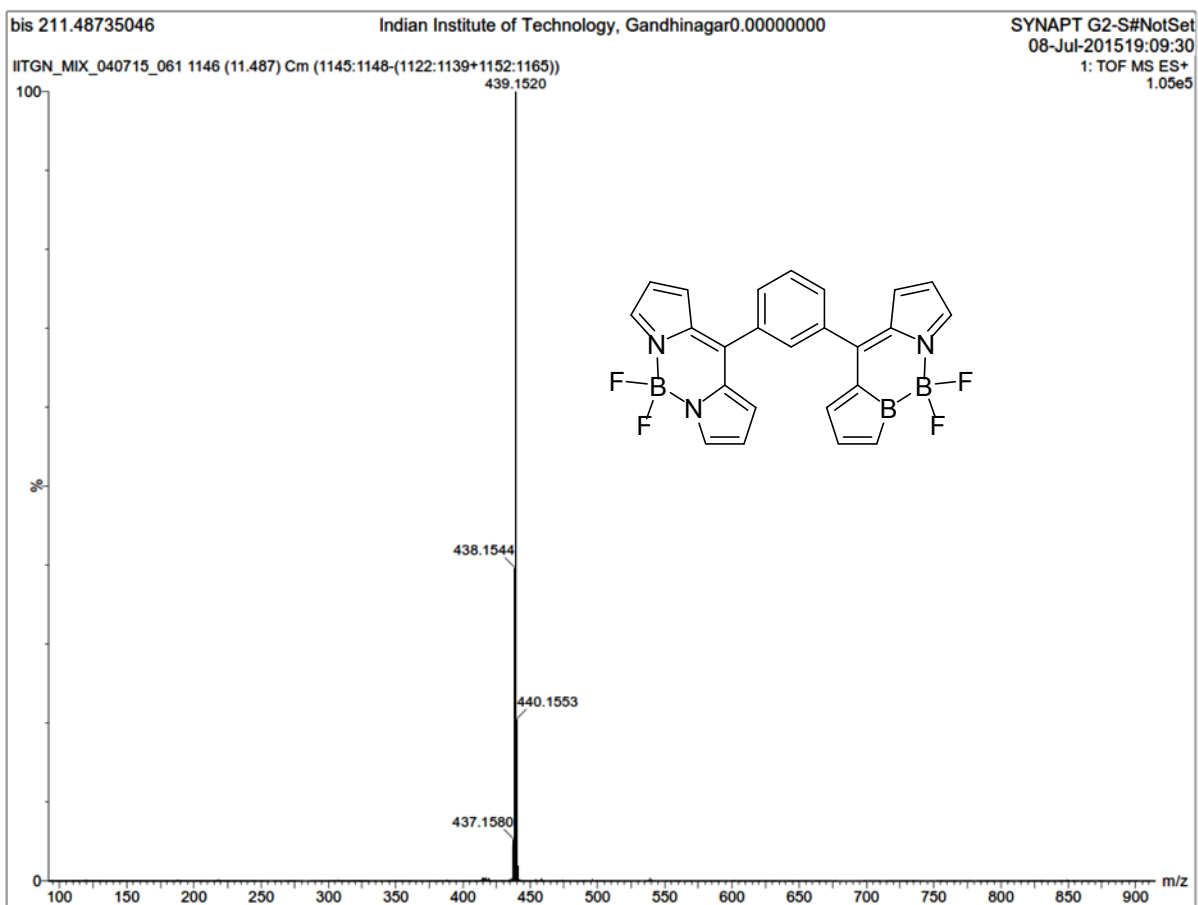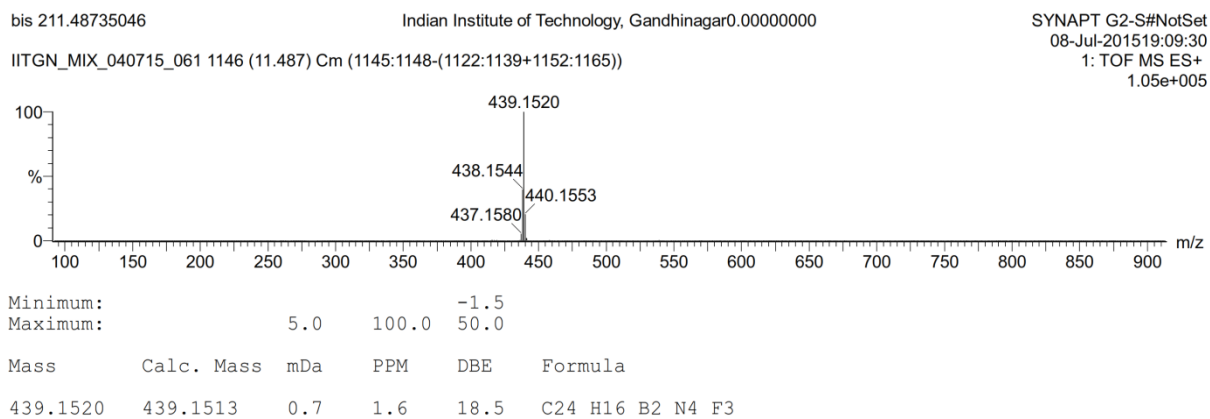

**Figure 14:** HRMS spectrum of Bis-BODIPY 2.

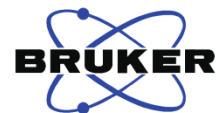

Current Data Parameters  
NAME praseetha  
EXPNO 45  
PROCNO 1

F2 - Acquisition Parameters  
Date\_ 20150630  
Time 20.59  
INSTRUM spect  
PROBHD 5 mm PABBO BB/  
PULPROG zg30  
TD 65536  
SOLVENT CDCl3  
NS 400  
DS 2  
SWH 10000.000 Hz  
FIDRES 0.152588 Hz  
AQ 3.2767999 sec  
RG 137.26  
DW 50.000 usec  
DE 6.50 usec  
TE 298.4 K  
D1 1.00000000 sec  
D11  
TD0 1

===== CHANNEL f1 =====  
SFO1 500.0930883 MHz  
NUC1 1H  
P1 9.88 usec  
PLW1 20.00000000 W

F2 - Processing parameters  
SI 65536  
SF 500.0900158 MHz  
WDW EM  
SSB 0  
LB 0.30 Hz  
GB 0  
PC 1.00

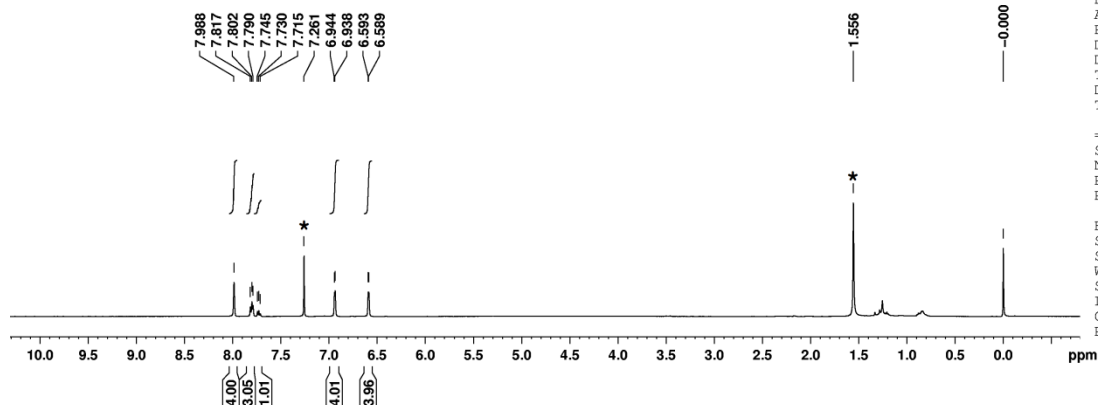

Figure 15:  $^1\text{H}$  NMR spectrum of Bis-BODIPY **2** in  $\text{CDCl}_3$ .

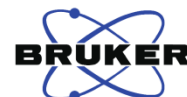

Current Data Parameters  
NAME praseetha  
EXPNO 20  
PROCNO 1

F2 - Acquisition Parameters  
Date\_ 20150617  
Time 20.59  
INSTRUM spect  
PROBHD 5 mm PABBO BB/  
PULPROG zgpg30  
TD 65536  
SOLVENT CDCl3  
NS 4000  
DS 4  
SWH 29761.904 Hz  
FIDRES 0.454131 Hz  
AQ 1.1010048 sec  
RG 200.08  
DW 16.800 usec  
DE 6.50 usec  
TE 299.8 K  
D1 2.00000000 sec  
D11 0.03000000 sec  
TD0 1

===== CHANNEL f1 =====  
SFO1 125.7603047 MHz  
NUC1 13C  
P1 8.50 usec  
PLW1 31.50000000 W

===== CHANNEL f2 =====  
SFO2 500.0920004 MHz  
NUC2 1H  
CPDPRG[2] waltz16  
PCPD2 80.00 usec  
PLW2 20.00000000 W  
PLW12 0.29707000 W  
PLW13 0.19013000 W

F2 - Processing parameters  
SI 32768  
SF 125.7477310 MHz  
WDW EM  
SSB 0  
LB 1.00 Hz  
GB 0  
PC 1.40

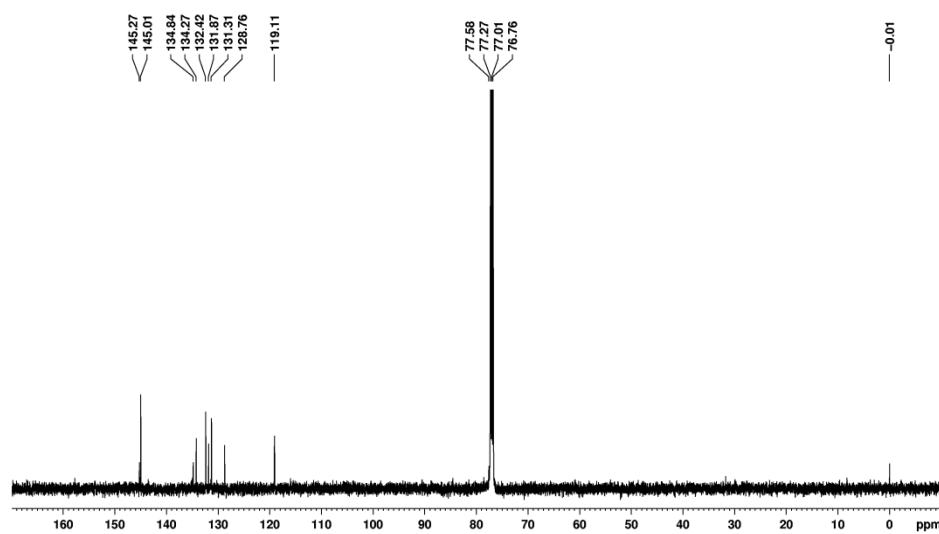

Figure 16:  $^{13}\text{C}$  NMR spectrum of Bis-BODIPY **2** in  $\text{CDCl}_3$ .



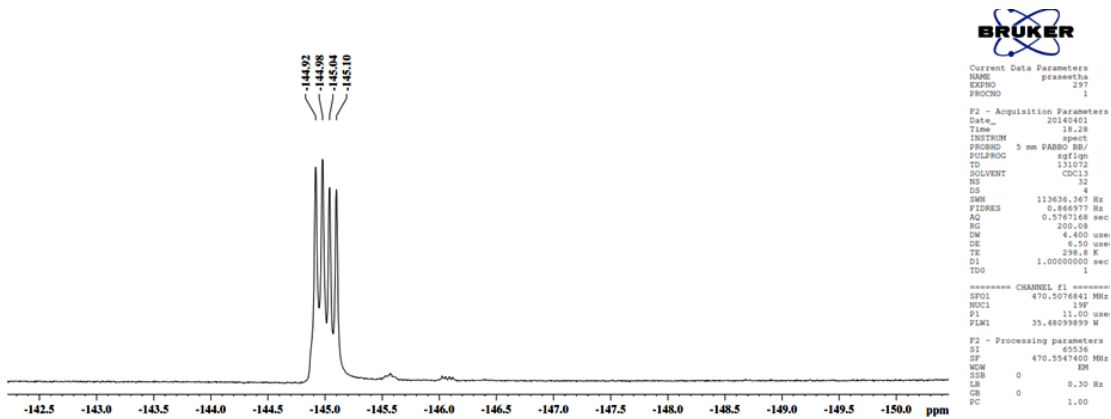

Figure 17:  $^{19}\text{F}$  NMR spectrum of Bis-BODIPY 2 in  $\text{CDCl}_3$ .

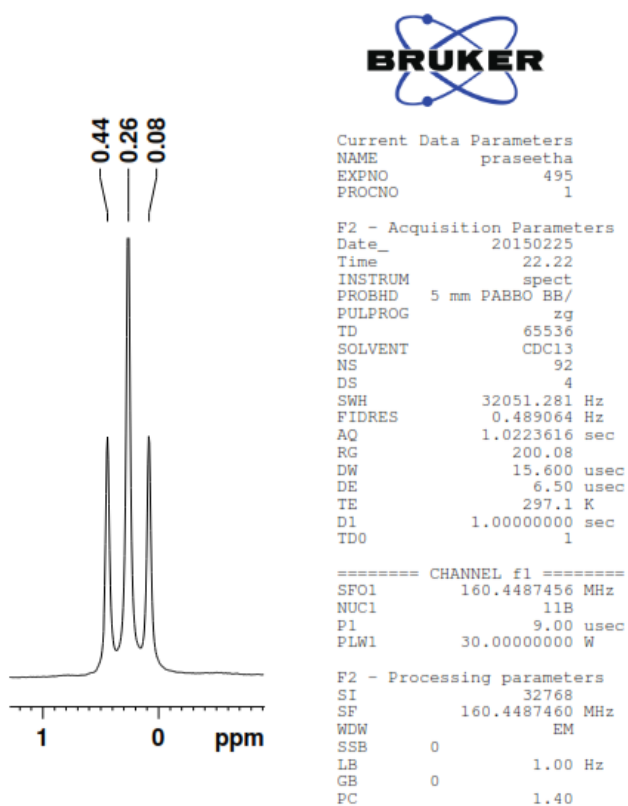

Figure 18:  $^{11}\text{B}$  NMR spectrum of Bis-BODIPY 2 in  $\text{CDCl}_3$ .

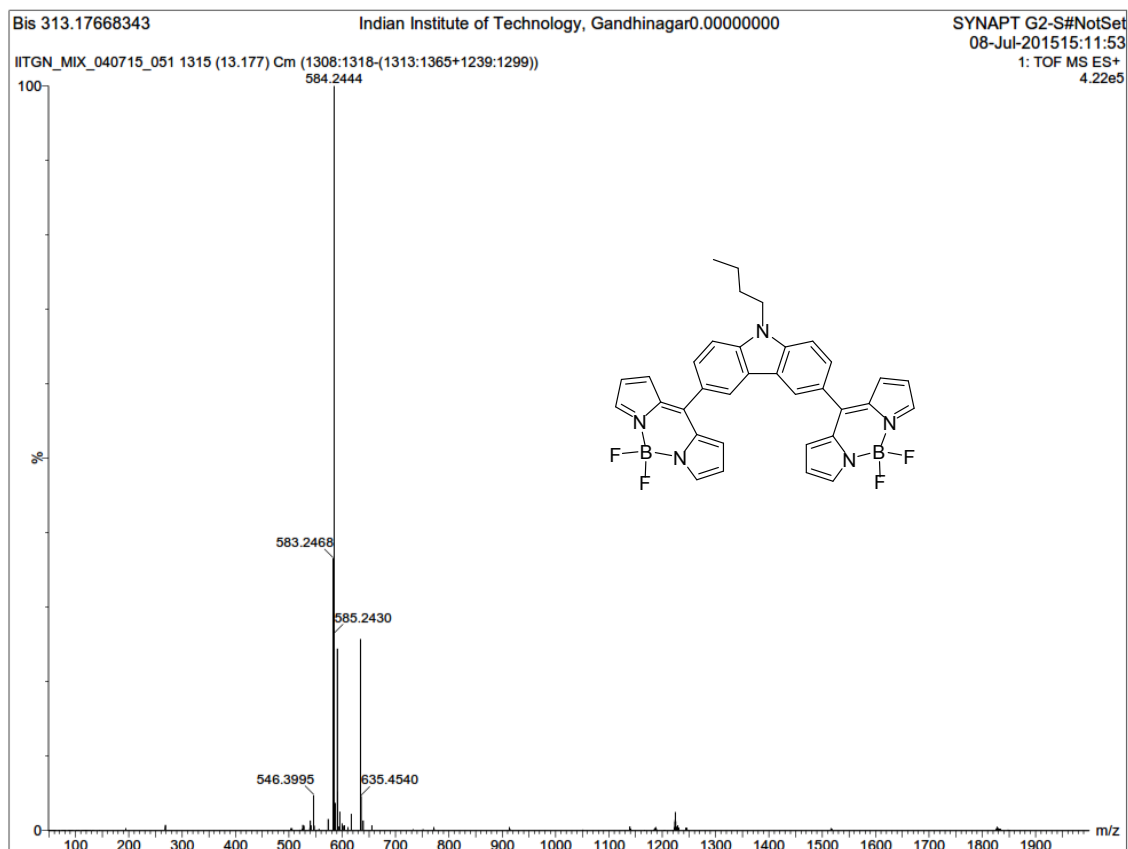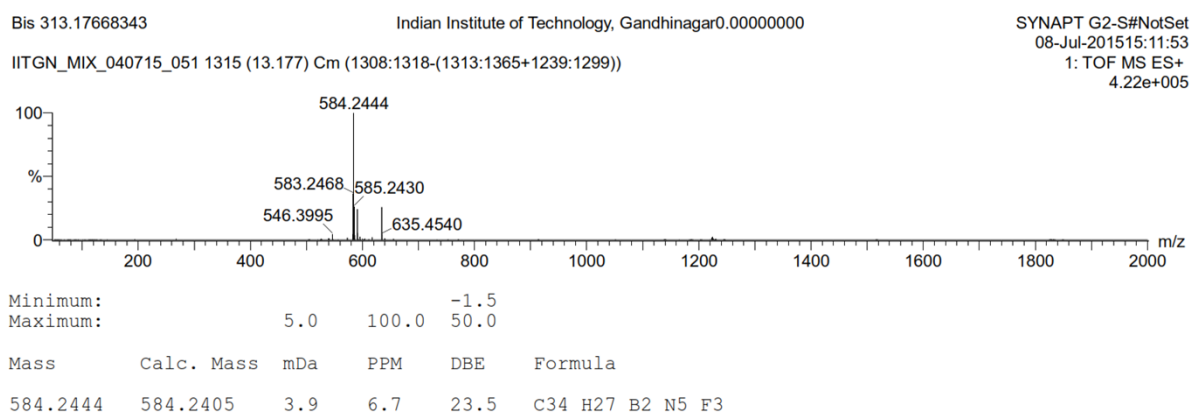

**Figure 19:** HRMS spectrum Bis-BODIPY 3.

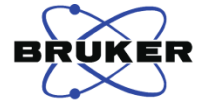

Current Data Parameters  
NAME praseetha  
EXPNO 55  
PROCNO 1

F2 - Acquisition Parameters  
Date\_ 20150707  
Time 9.15  
INSTRUM spect  
PROBHD 5 mm PABBO BB/  
PULPROG zg30  
TD 65536  
SOLVENT CDCl3  
NS 128  
DS 2  
SWH 10000.000 Hz  
FIDRES 0.152388 Hz  
AQ 3.2767999 sec  
RG 157.63  
DW 50.000 usec  
DE 6.50 usec  
TE 298.7 K  
D1 1.00000000 sec  
TD0 1

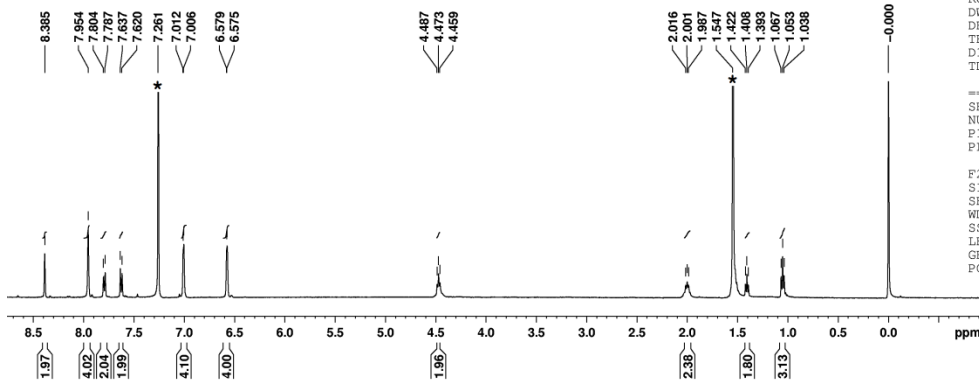

===== CHANNEL f1 =====  
SFO1 500.0930883 MHz  
NUC1 1H  
P1 9.88 usec  
PLW1 20.00000000 W

F2 - Processing parameters  
SI 65536  
SF 500.0900163 MHz  
WDW EM  
SSB 0  
LB 0.30 Hz  
GB 0  
PC 1.00

Figure 20:  $^1\text{H}$  NMR spectrum of Bis-BODIPY 3 in  $\text{CDCl}_3$ .

bis 3 13C

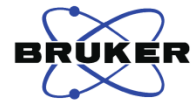

Current Data Parameters  
NAME praseetha  
EXPNO 59  
PROCNO 1

F2 - Acquisition Parameters  
Date\_ 20150708  
Time 10.03  
INSTRUM spect  
PROBHD 5 mm PABBO BB/  
PULPROG zgpg30  
TD 65536  
SOLVENT CDCl3  
NS 16000  
DS 4  
SWH 29761.904 Hz  
FIDRES 0.454131 Hz  
AQ 1.1010048 sec  
RG 200.08  
DW 16.800 usec  
DE 6.50 usec  
TE 300.4 K  
D1 2.00000000 sec  
D11 0.03000000 sec  
TD0 1

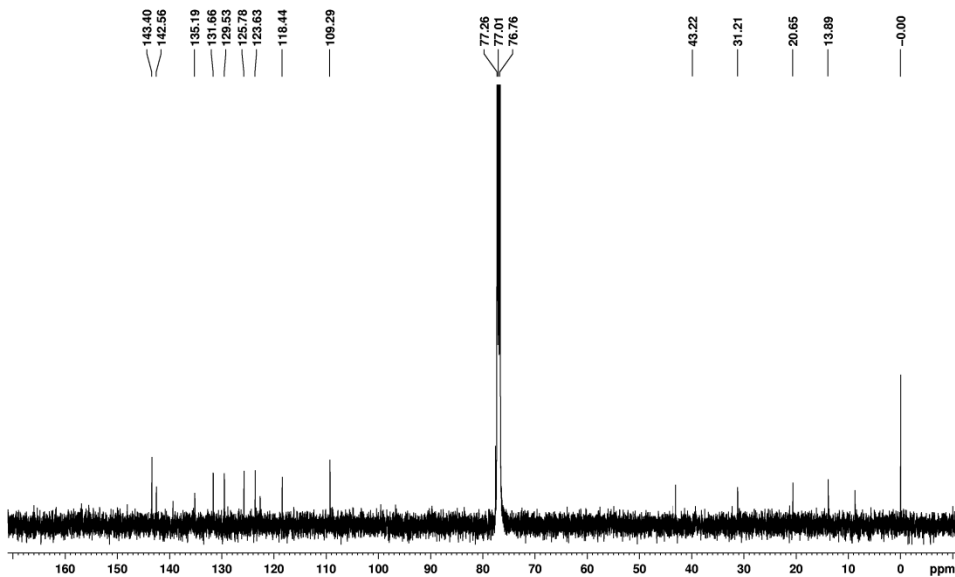

===== CHANNEL f1 =====  
SFO1 125.7603047 MHz  
NUC1 13C  
P1 8.50 usec  
PLW1 31.50000000 W

===== CHANNEL f2 =====  
SFO2 500.0920004 MHz  
NUC2 1H  
CPDPRG2 waltz16  
PCPD2 80.00 usec  
PLW2 20.00000000 W  
PLW12 0.29707000 W  
PLW13 0.19013000 W

F2 - Processing parameters  
SI 32768  
SF 125.7477306 MHz  
WDW EM  
SSB 0  
LB 1.00 Hz  
GB 0  
PC 1.40

Figure 21:  $^{13}\text{C}$  NMR spectrum of Bis-BODIPY 3 in  $\text{CDCl}_3$ .

N bu cbz bis BODIPY

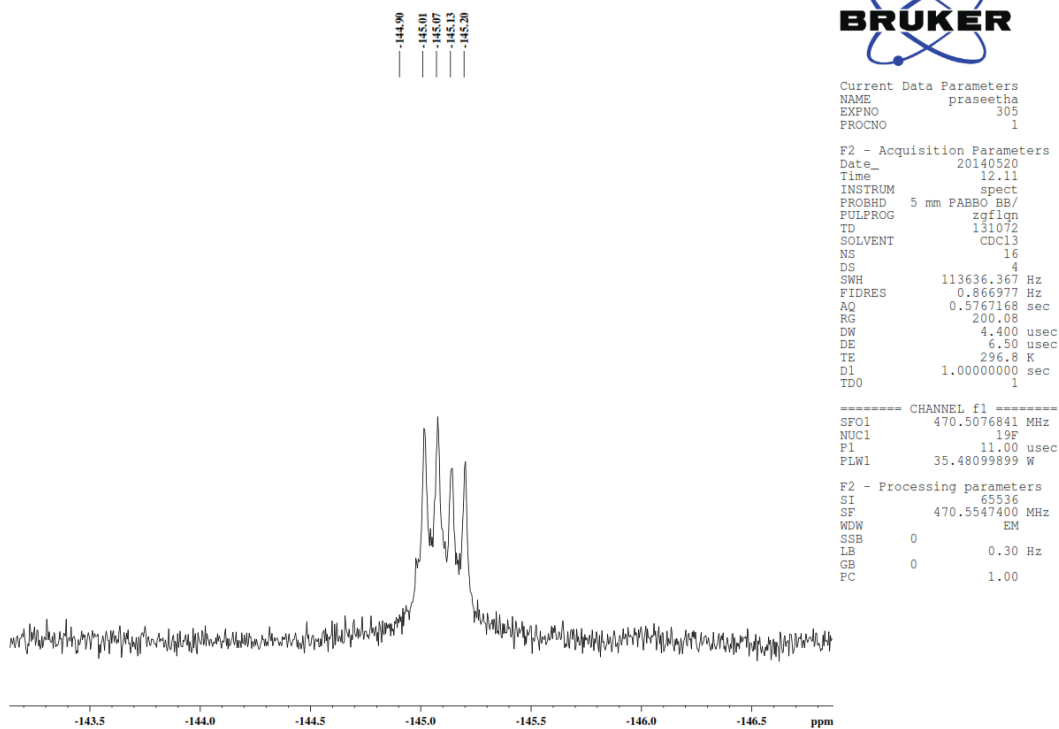

Figure 22:  $^{19}\text{F}$  NMR spectrum of Bis-BODIPY 3 in  $\text{CDCl}_3$ .

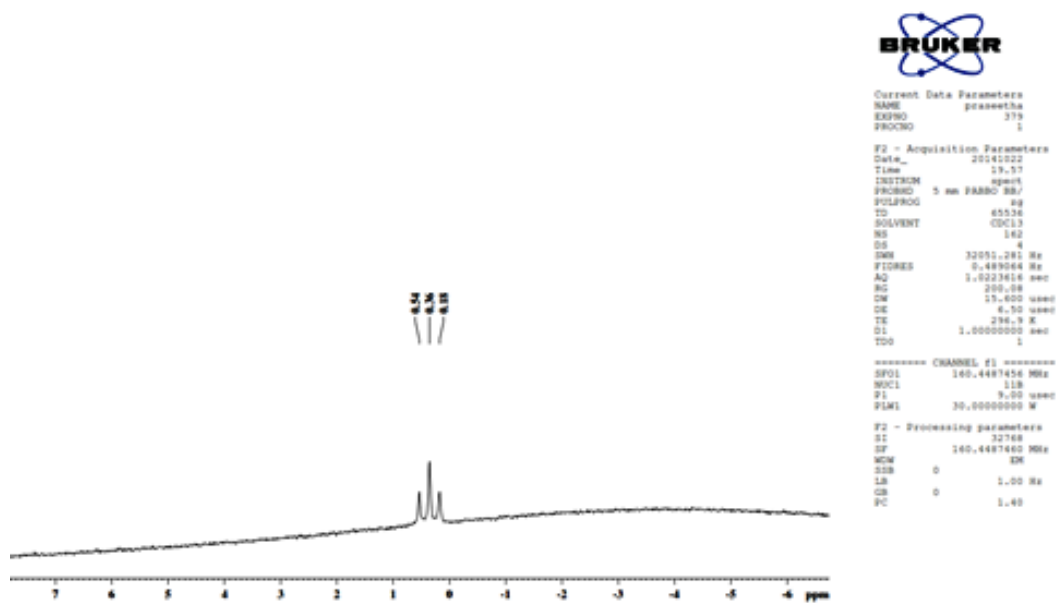

Figure 23:  $^{11}\text{B}$  NMR spectrum of Bis-BODIPY 3 in  $\text{CDCl}_3$ .

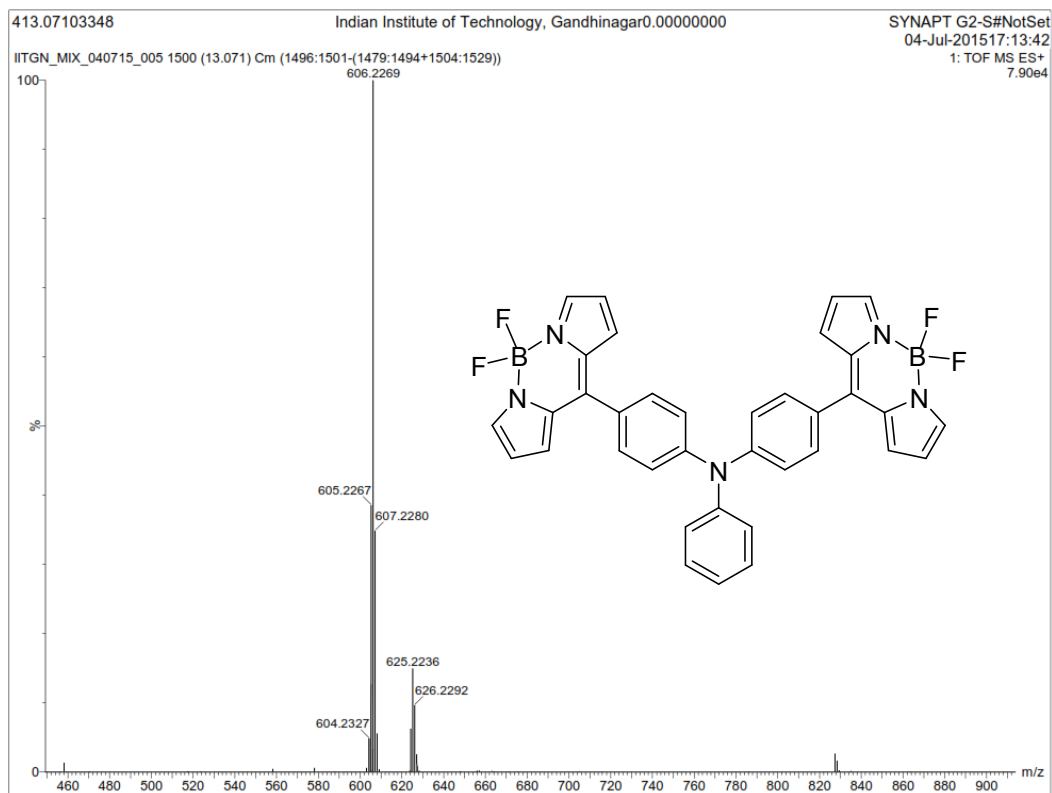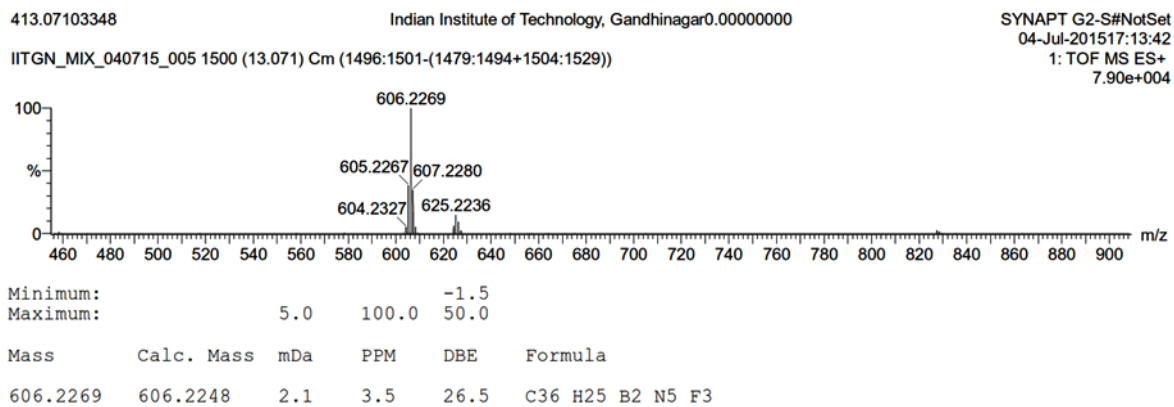

**Figure 24:** HRMS spectrum of Bis-BODIPY 4.

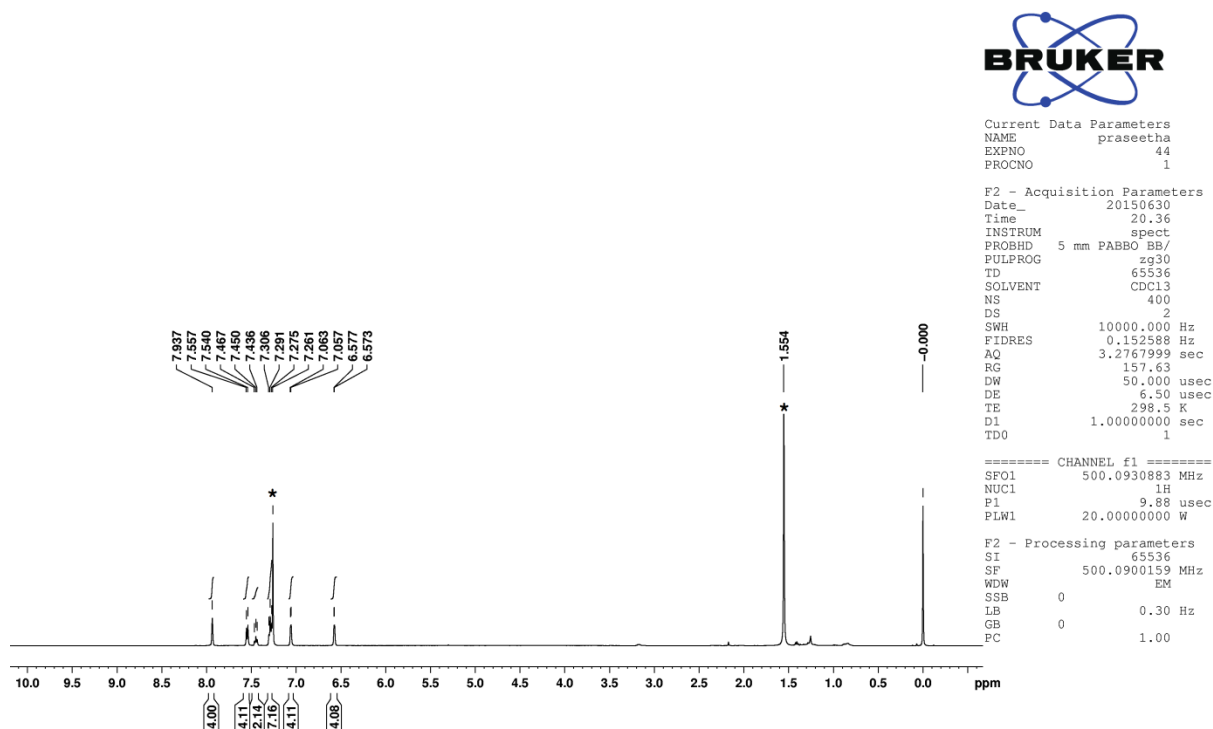

**Figure 25:**  $^1\text{H}$  NMR spectrum of Bis-BODIPY 4 in  $\text{CDCl}_3$ .

bis bodipy 4 13C

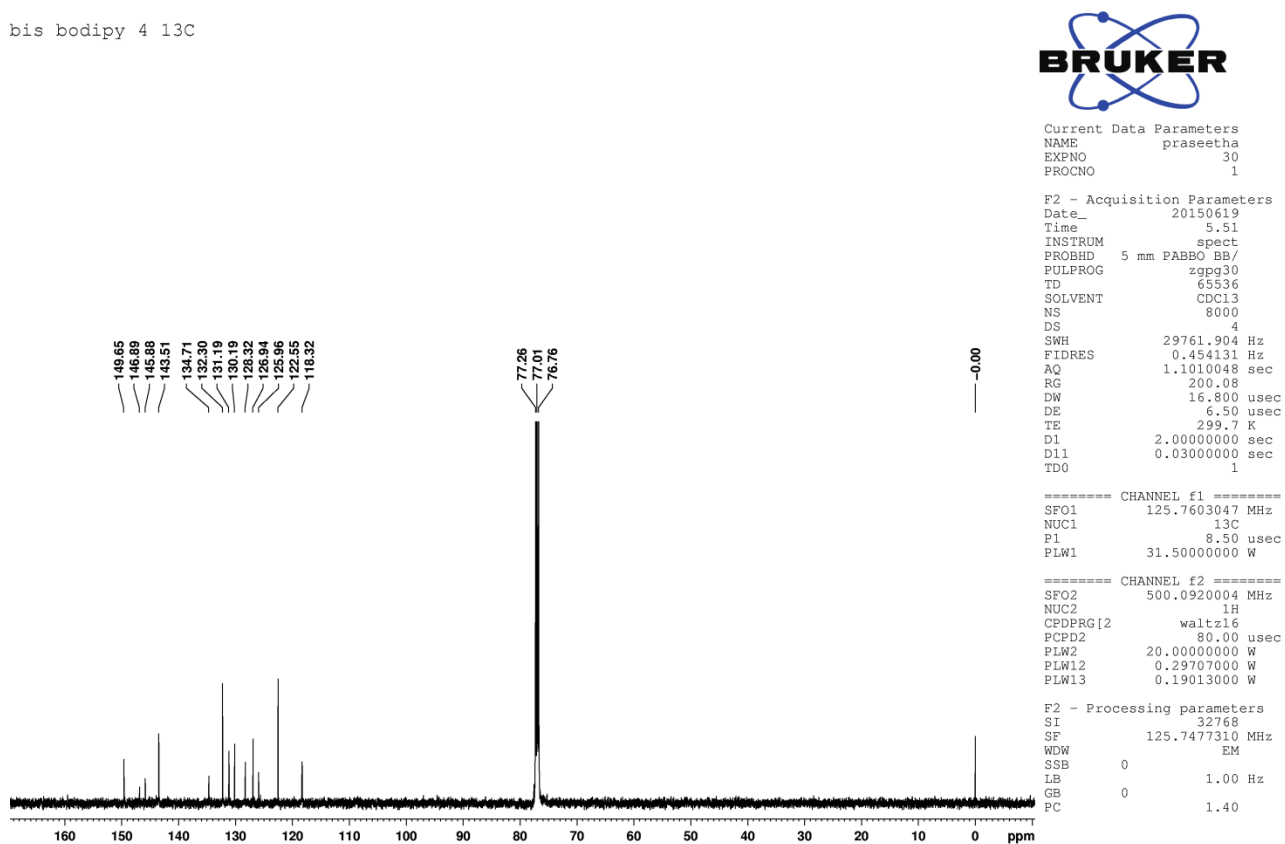

**Figure 26:**  $^{13}\text{C}$  NMR spectrum of Bis-BODIPY 4 in  $\text{CDCl}_3$ .

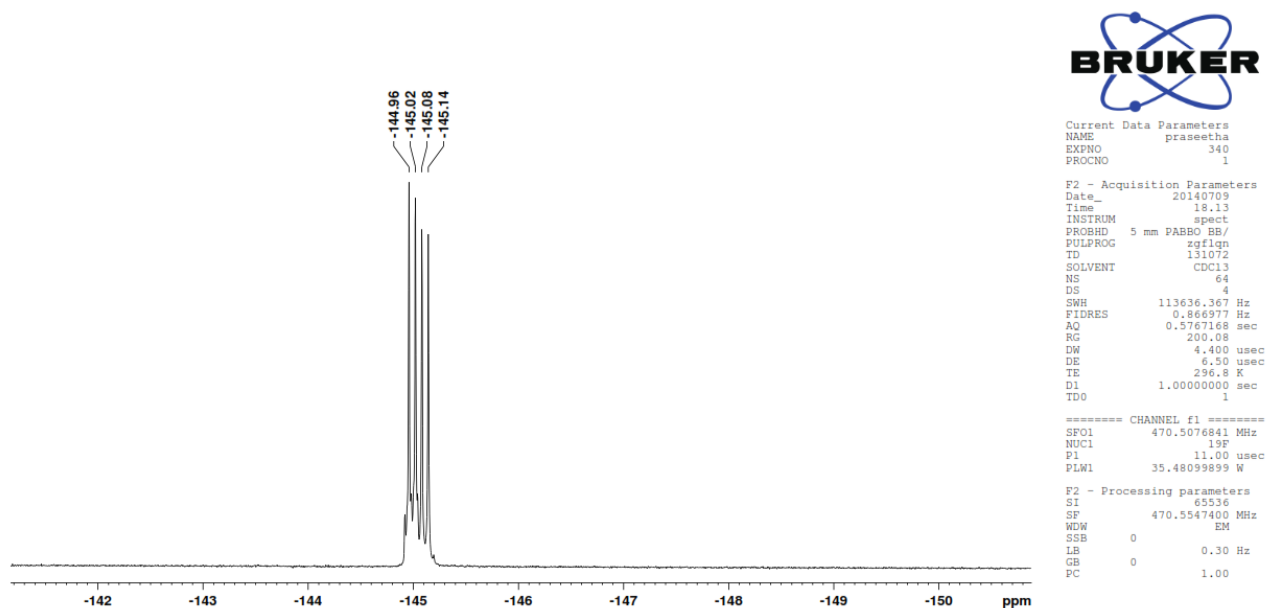

Figure 27:  $^{19}\text{F}$  NMR spectrum of Bis-BODIPY 4 in  $\text{CDCl}_3$ .

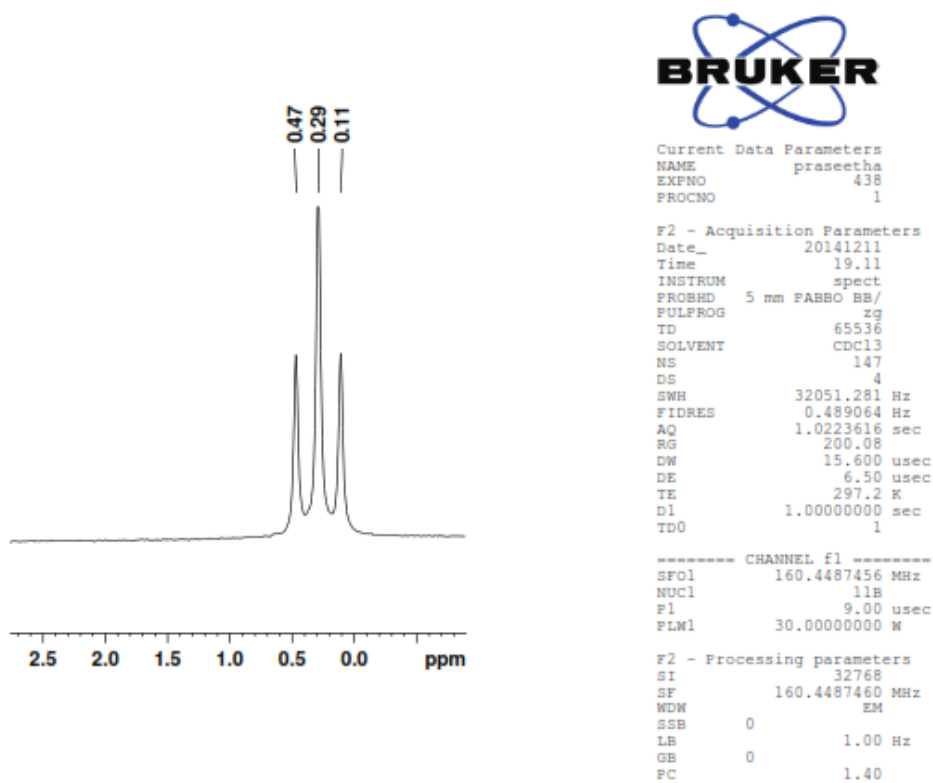

Figure 28:  $^{11}\text{B}$  NMR spectrum of Bis-BODIPY 4 in  $\text{CDCl}_3$ .

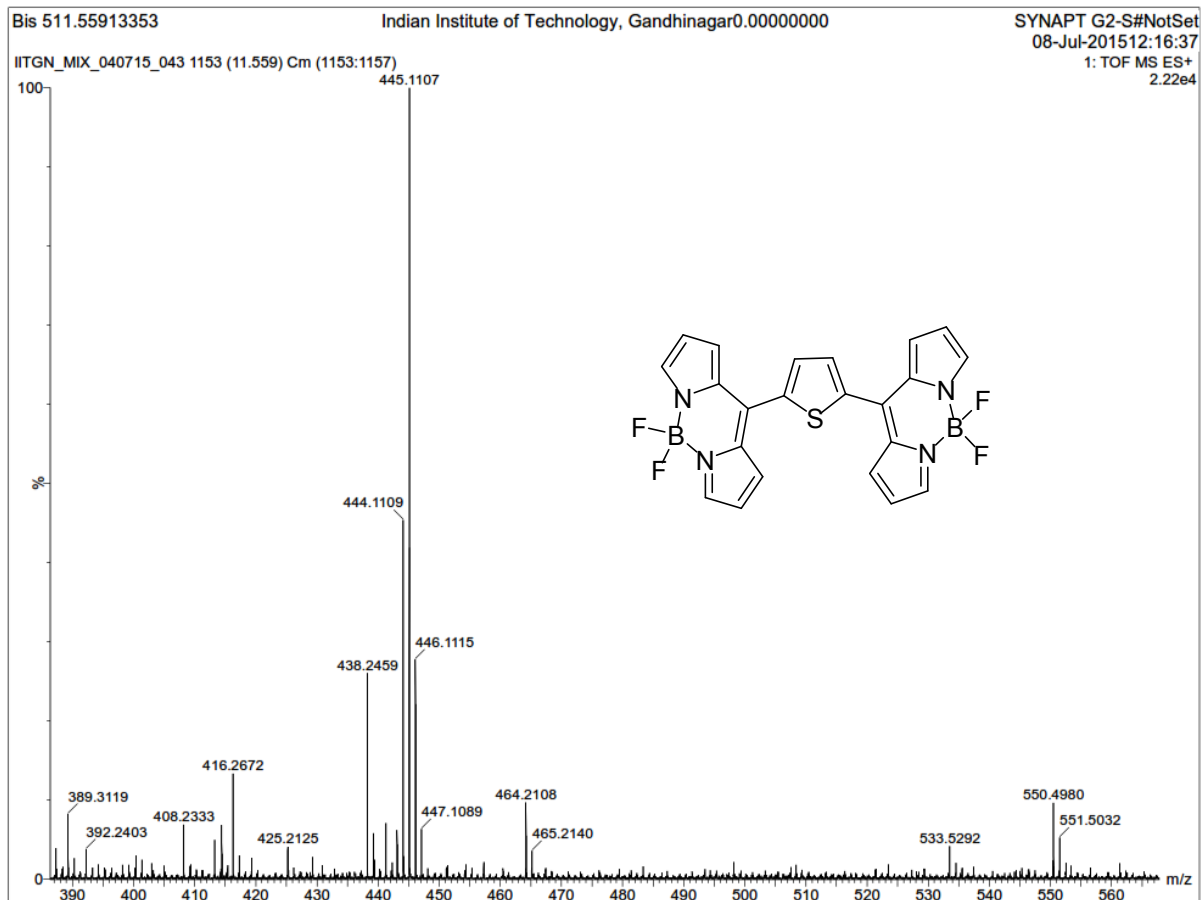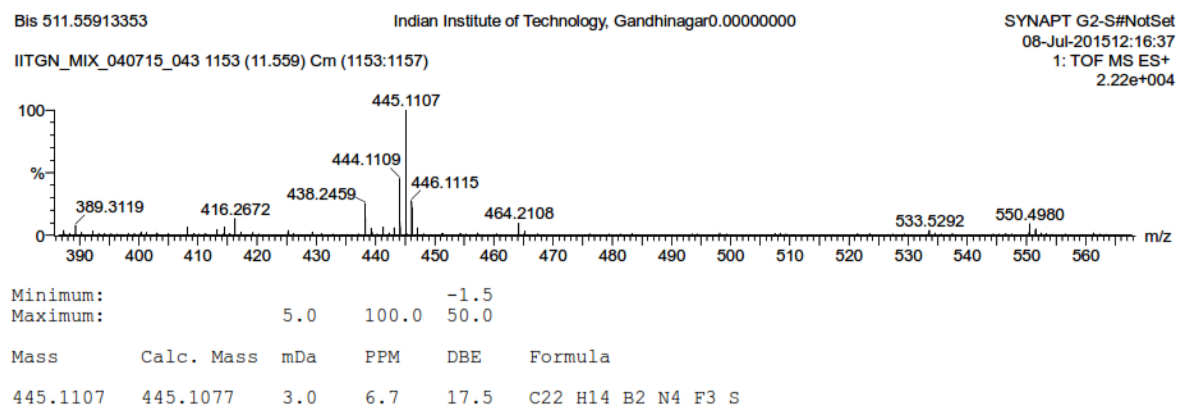

**Figure 29:** HRMS spectrum Bis-BODIPY 5.



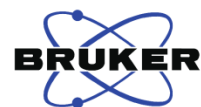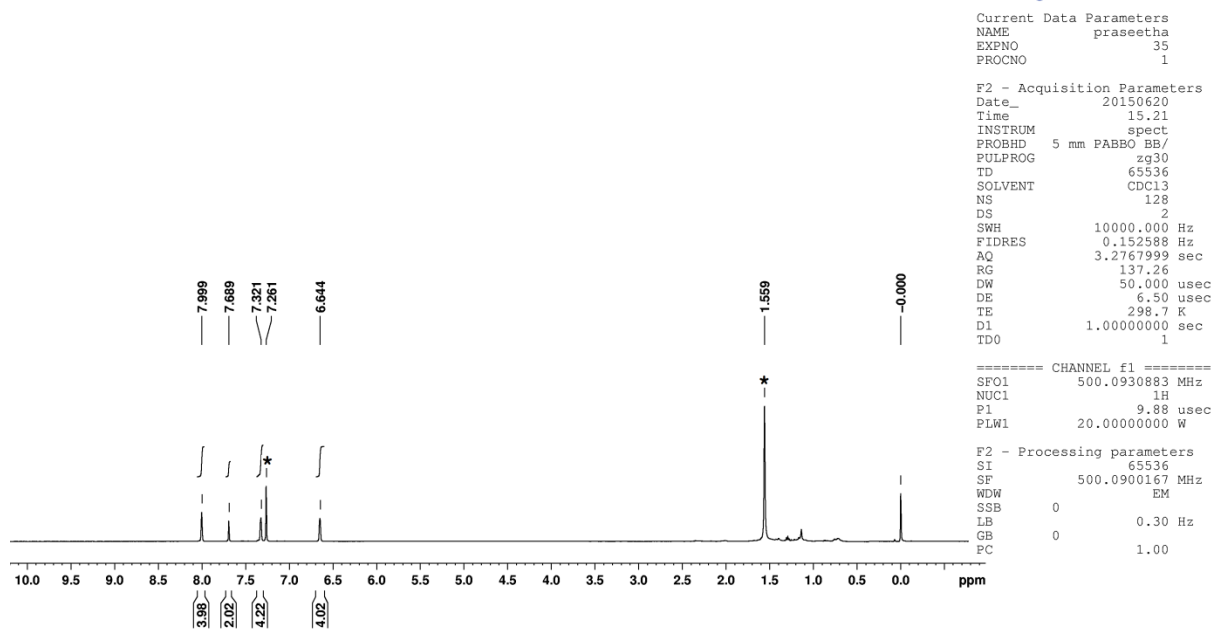

Figure 30:  $^1\text{H}$  NMR spectrum Bis-BODIPY 5 in  $\text{CDCl}_3$ .

bis bodipy 5 13C

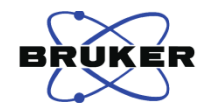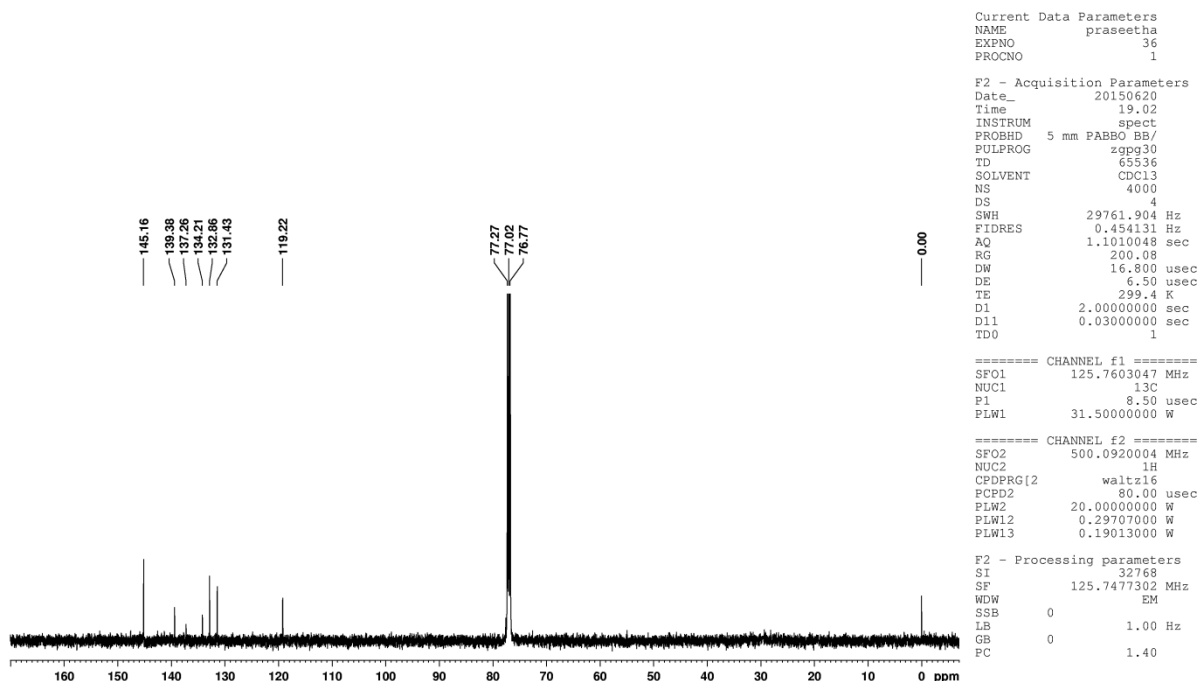

Figure 31:  $^{13}\text{C}$  NMR spectrum of Bis-BODIPY 5 in  $\text{CDCl}_3$ .

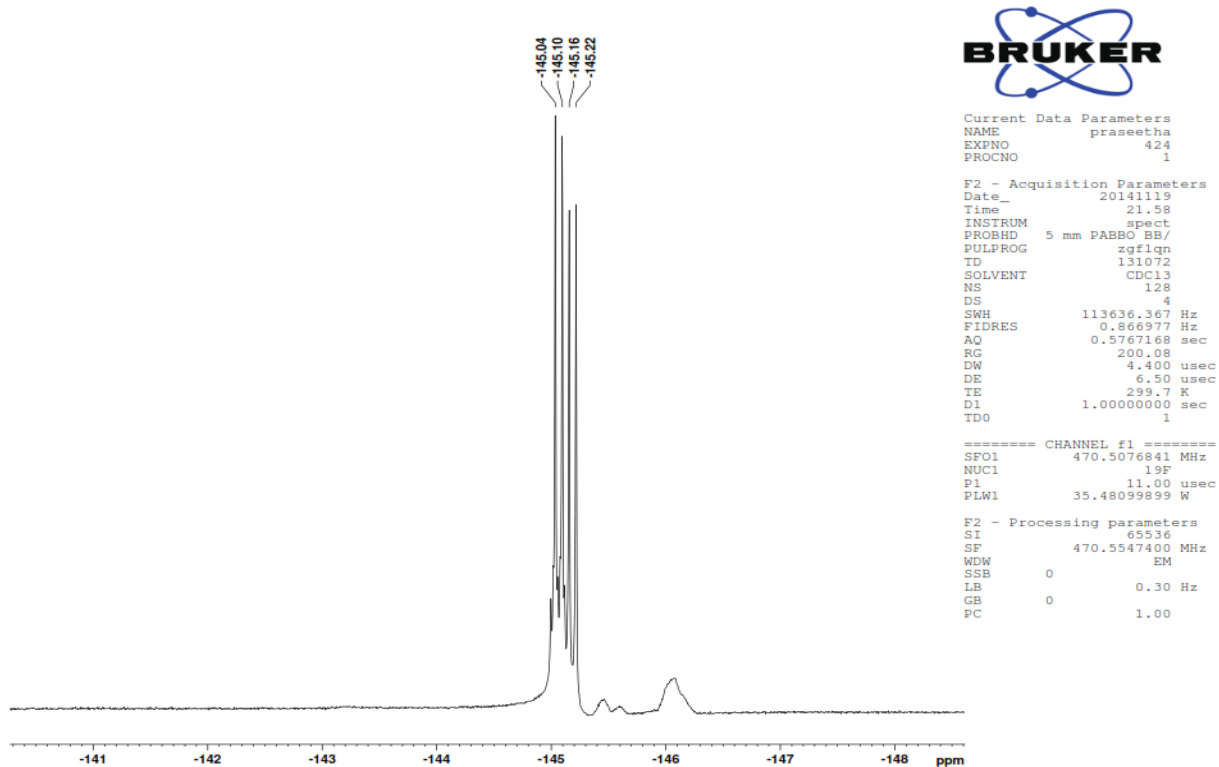

Figure 32:  $^{19}\text{F}$  NMR spectrum of Bis-BODIPY 5 in  $\text{CDCl}_3$ .

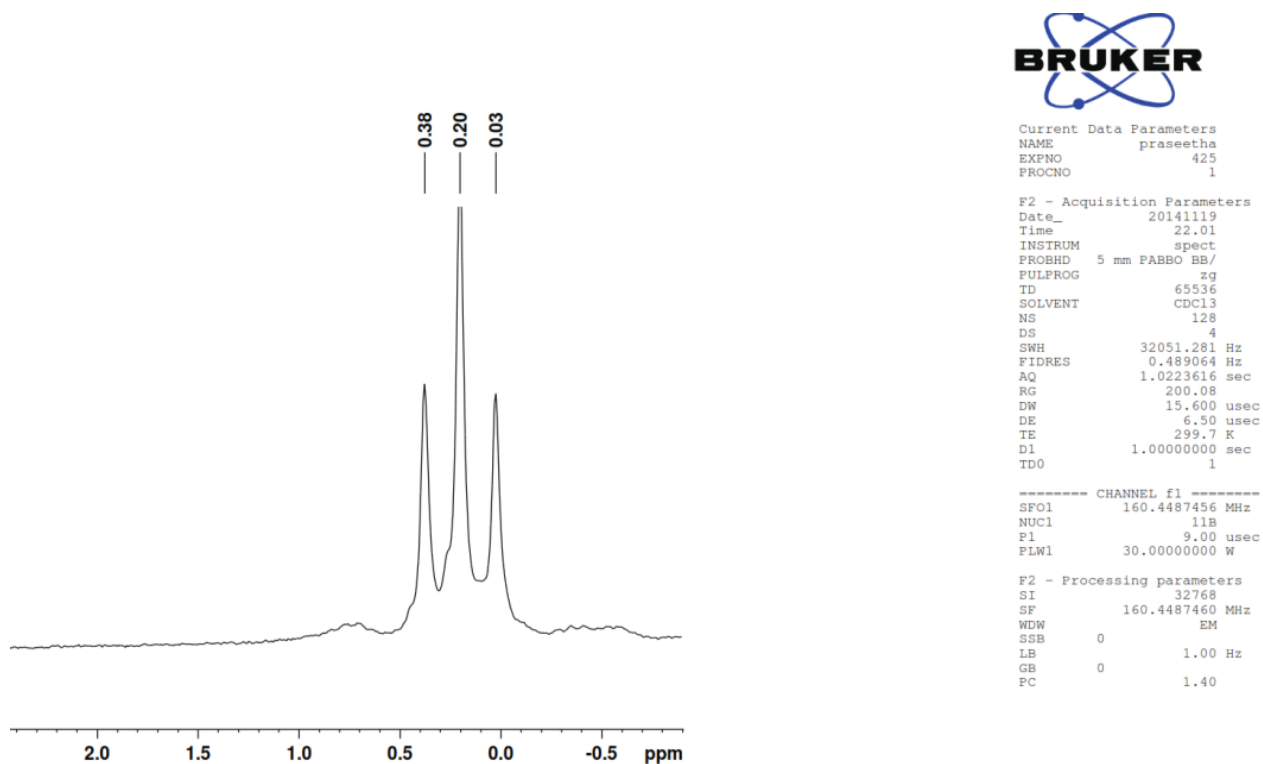

Figure 33:  $^{11}\text{B}$  NMR spectrum of Bis-BODIPY 5 in  $\text{CDCl}_3$ .

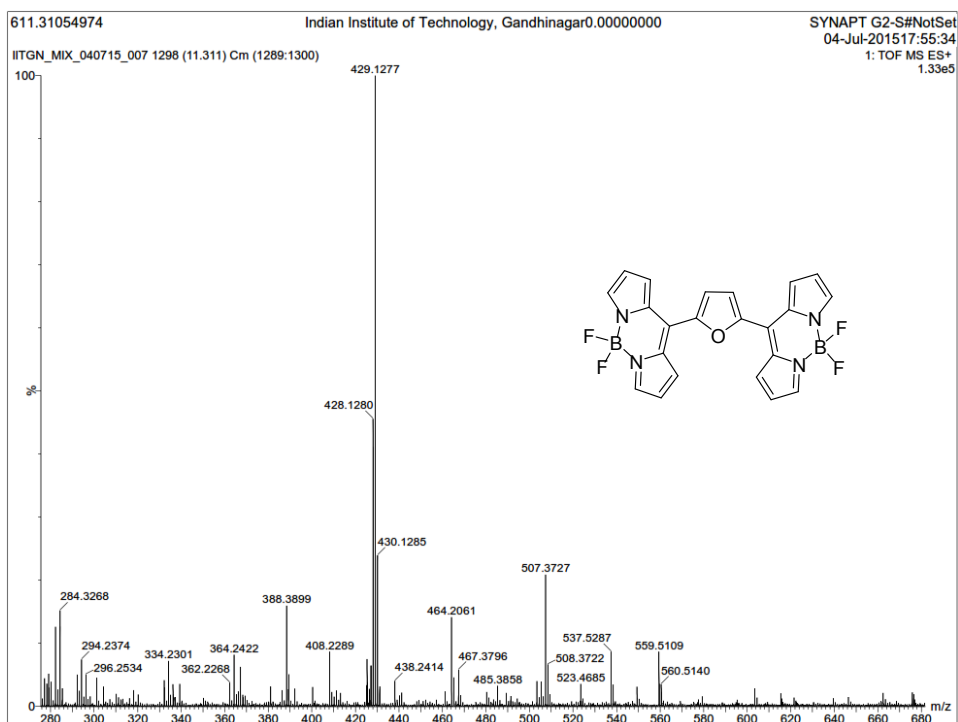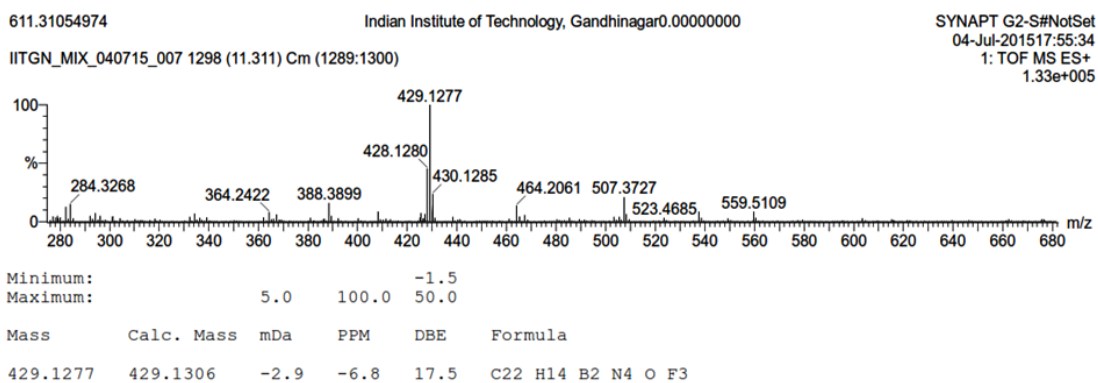

**Figure 34:** HRMS spectrum Bis-BODIPY 6.

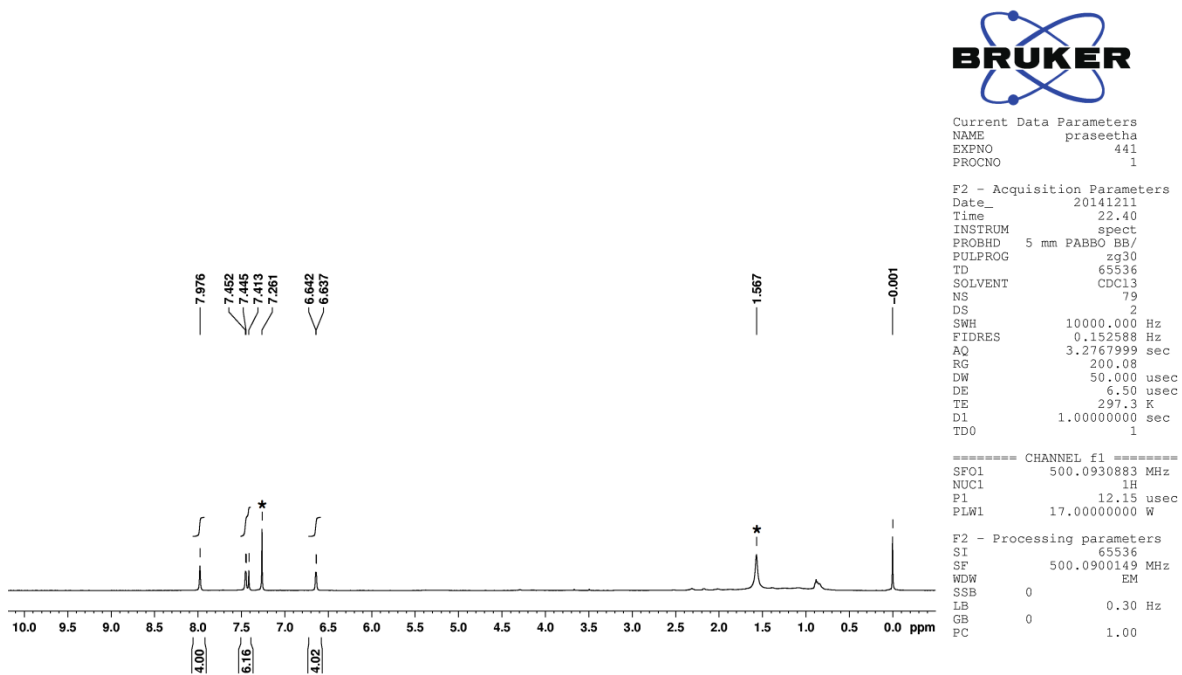

Figure 35:  $^1\text{H}$  NMR spectrum of Bis-BODIPY 6 in  $\text{CDCl}_3$ .

oxa bis bodipy

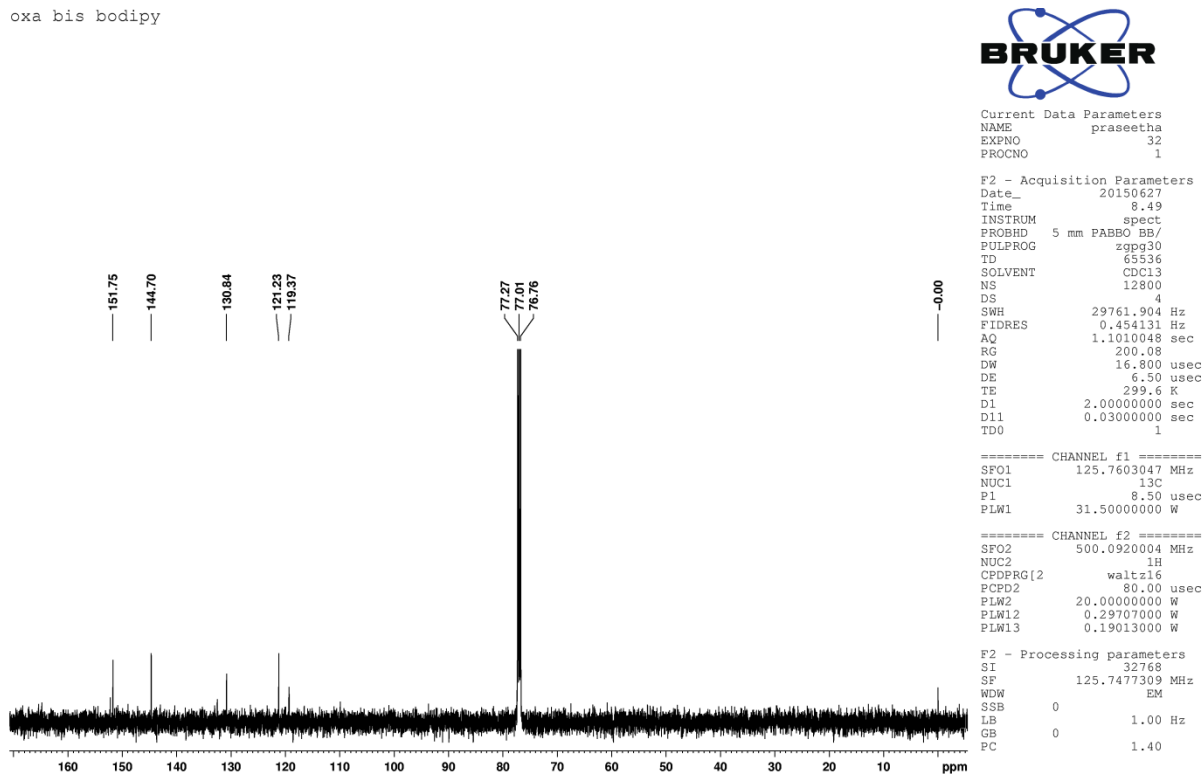

Figure 36:  $^{13}\text{C}$  NMR spectrum of Bis-BODIPY 6 in  $\text{CDCl}_3$ .

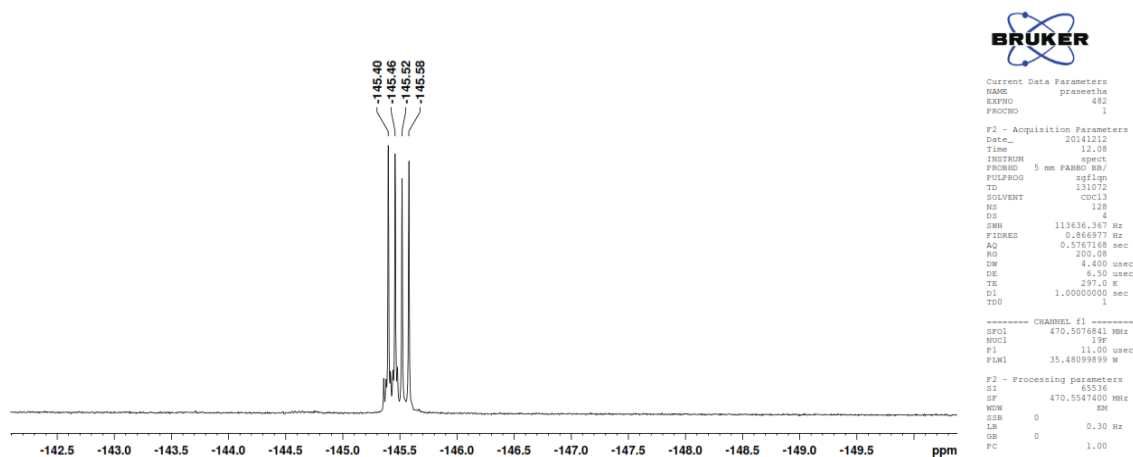

Figure 37: <sup>19</sup>F NMR spectrum of Bis-BODIPY 6 in CDCl<sub>3</sub>.

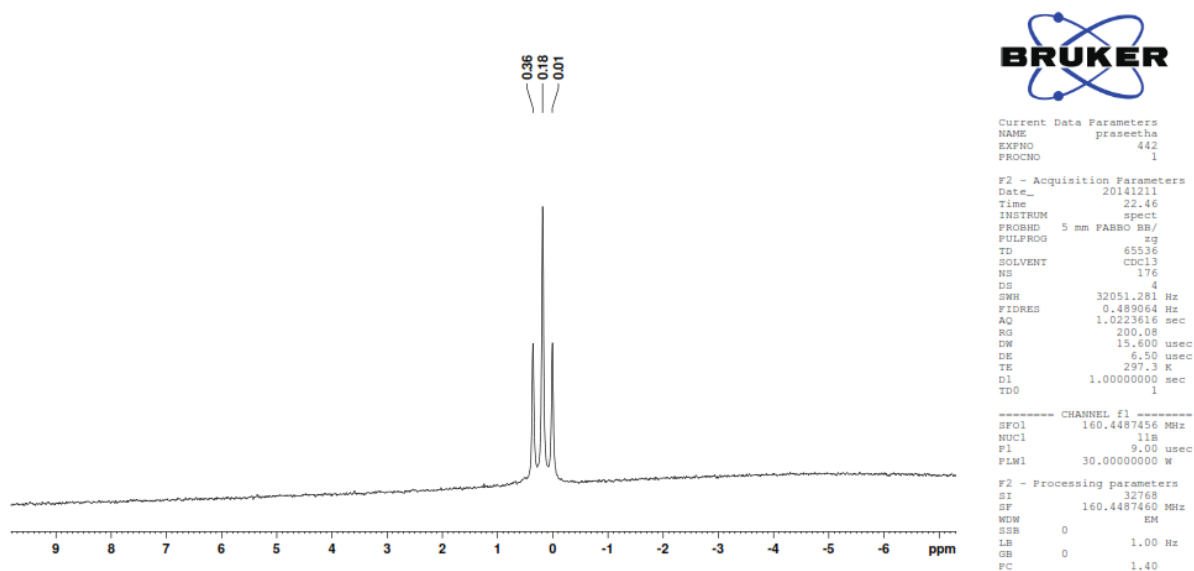

Figure 38: <sup>11</sup>B NMR spectrum of Bis-BODIPY 6 in CDCl<sub>3</sub>.

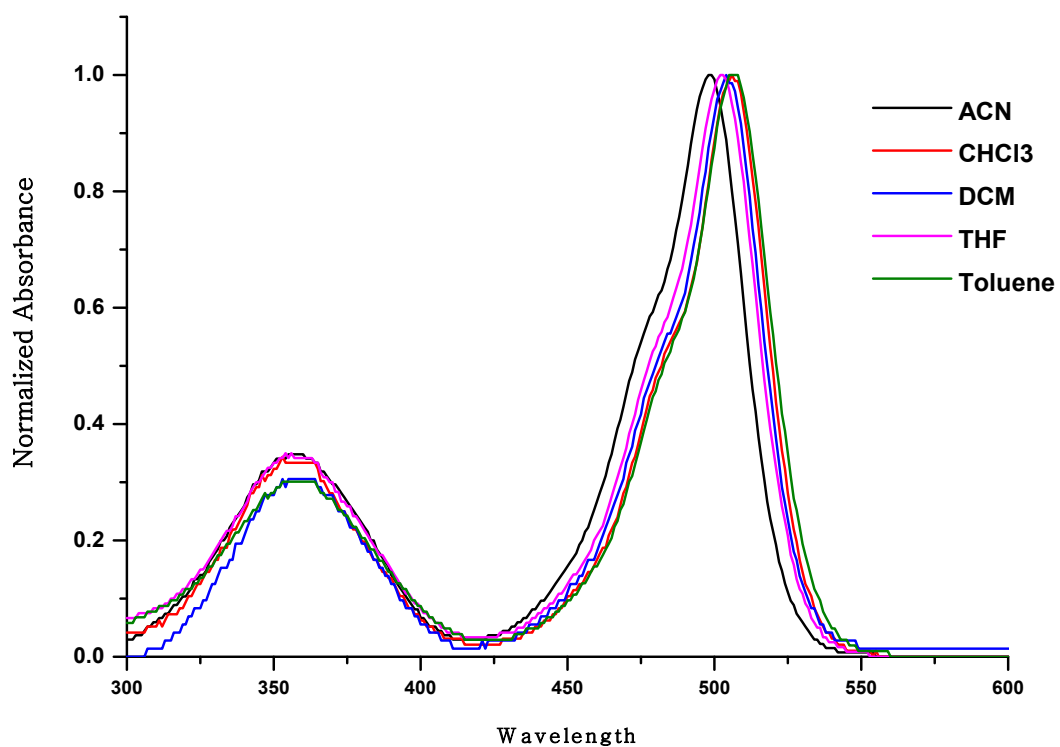

**Figure 39:** UV-Vis spectra of Bis- BODIPY 1 in different solvents.

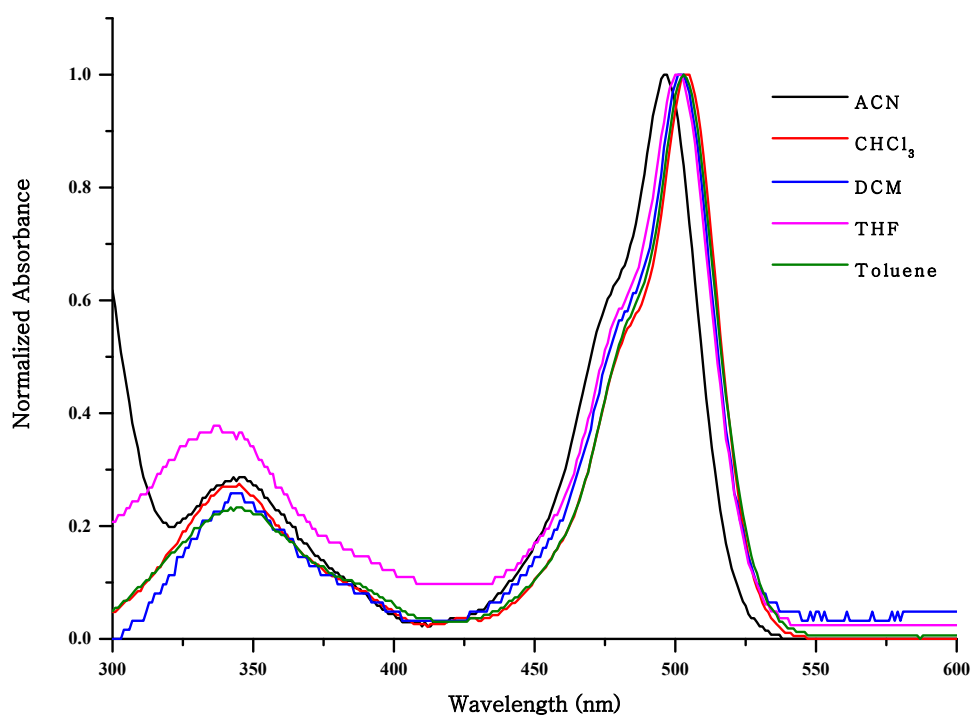

**Figure 40:** UV-Vis spectra of Bis- BODIPY 2 in different solvents.

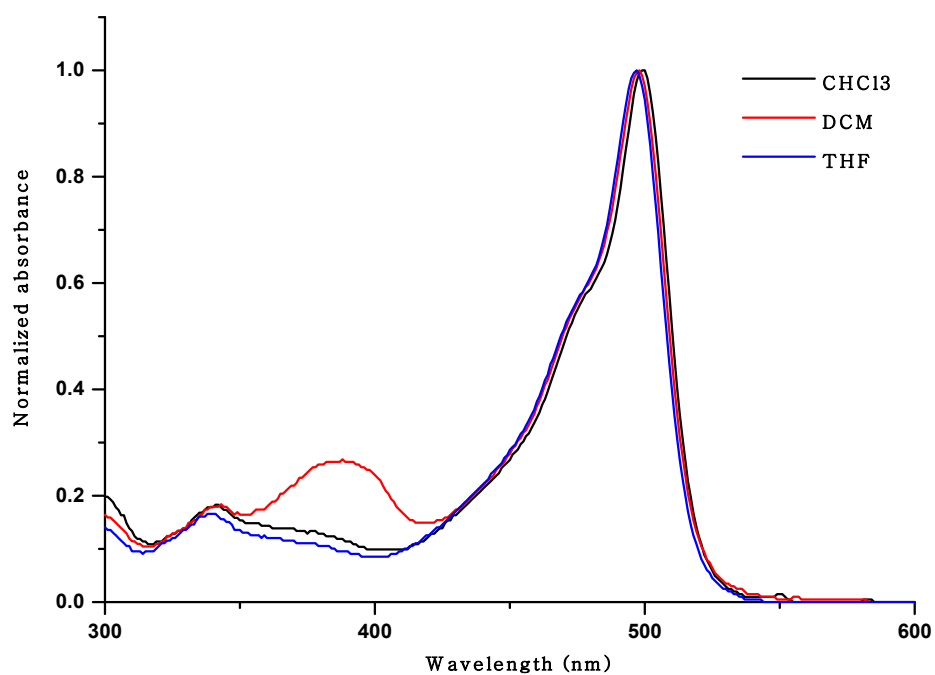

**Figure 41:** UV-Vis spectra of Bis- BODIPY 3 in different solvents.

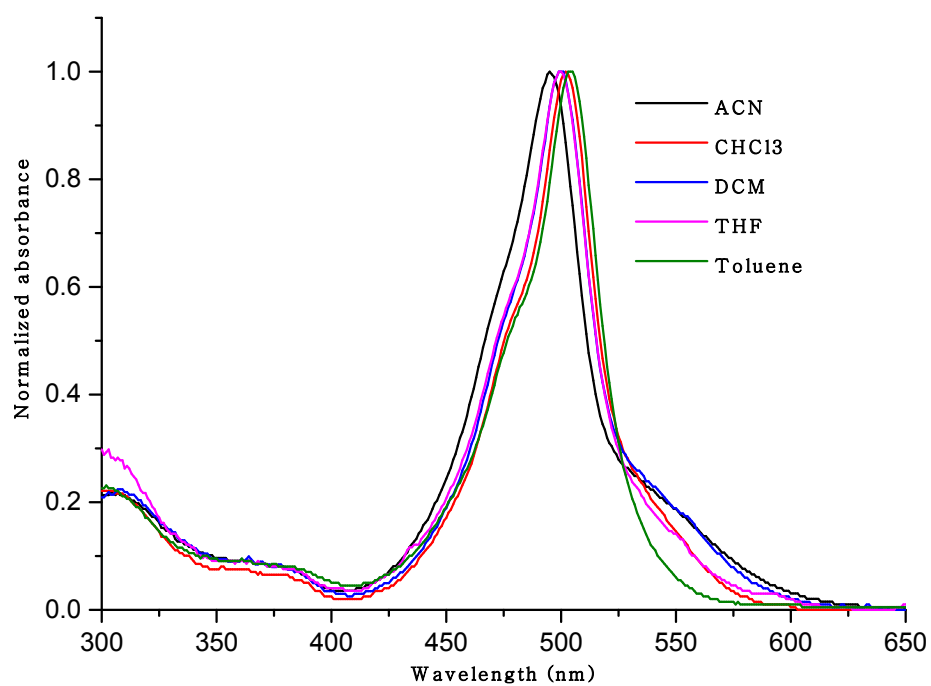

**Figure 42:** UV-Vis spectra of Bis- BODIPY 4 in different solvents.

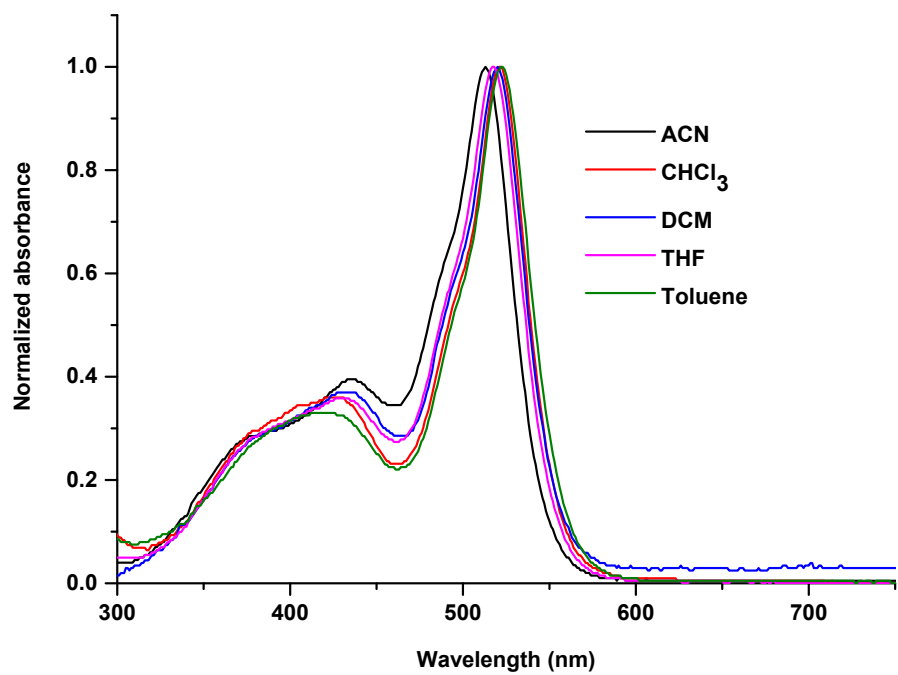

**Figure 43:** UV-Vis spectra of Bis- BODIPY **5** in different solvents.

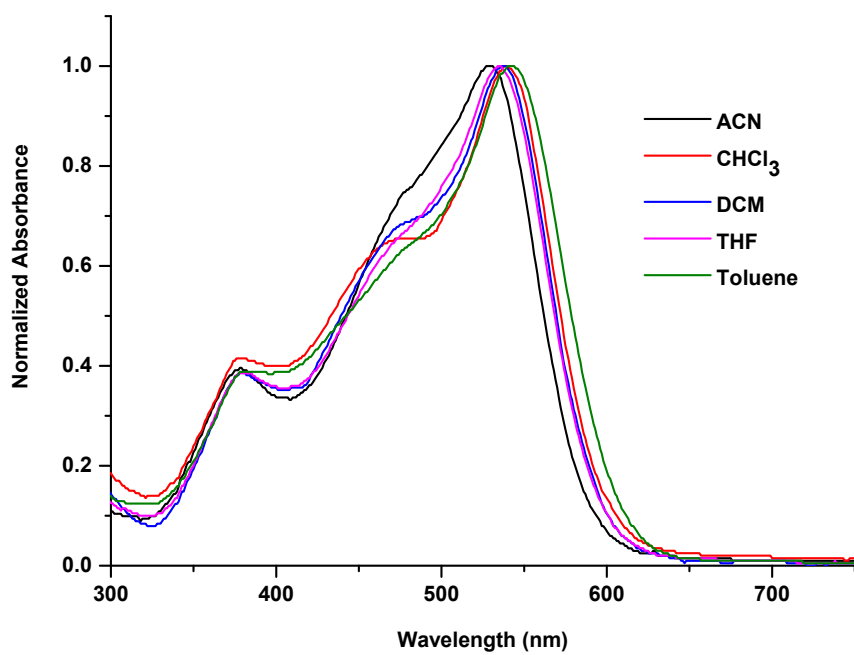

**Figure 44:** UV-Vis spectra of Bis- BODIPY **6** in different solvents.



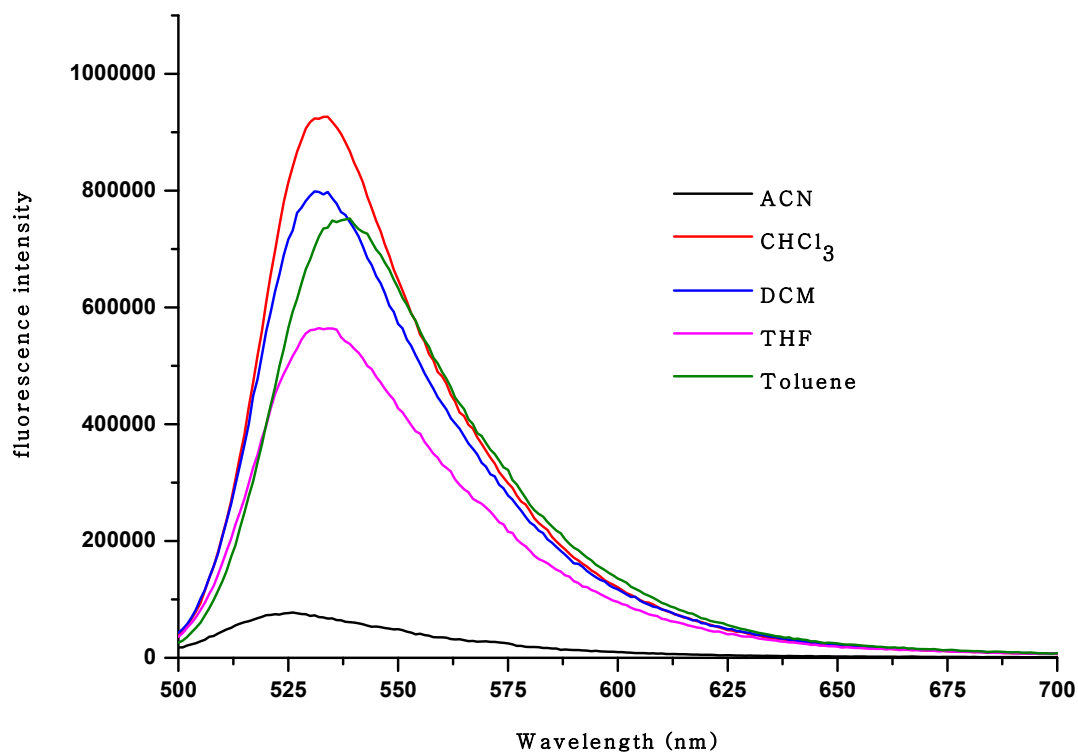

**Figure 45:** Steady state fluorescence spectra of Bis- BODIPY 1 in different solvents.

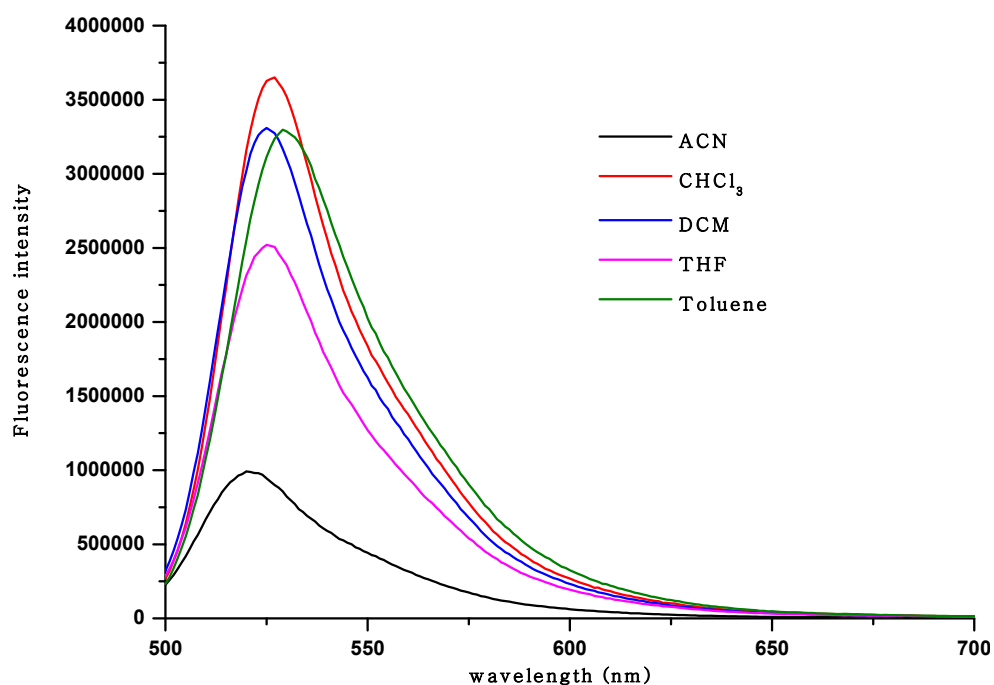

**Figure 46:** Steady state fluorescence spectra of Bis- BODIPY 2 in different solvents.

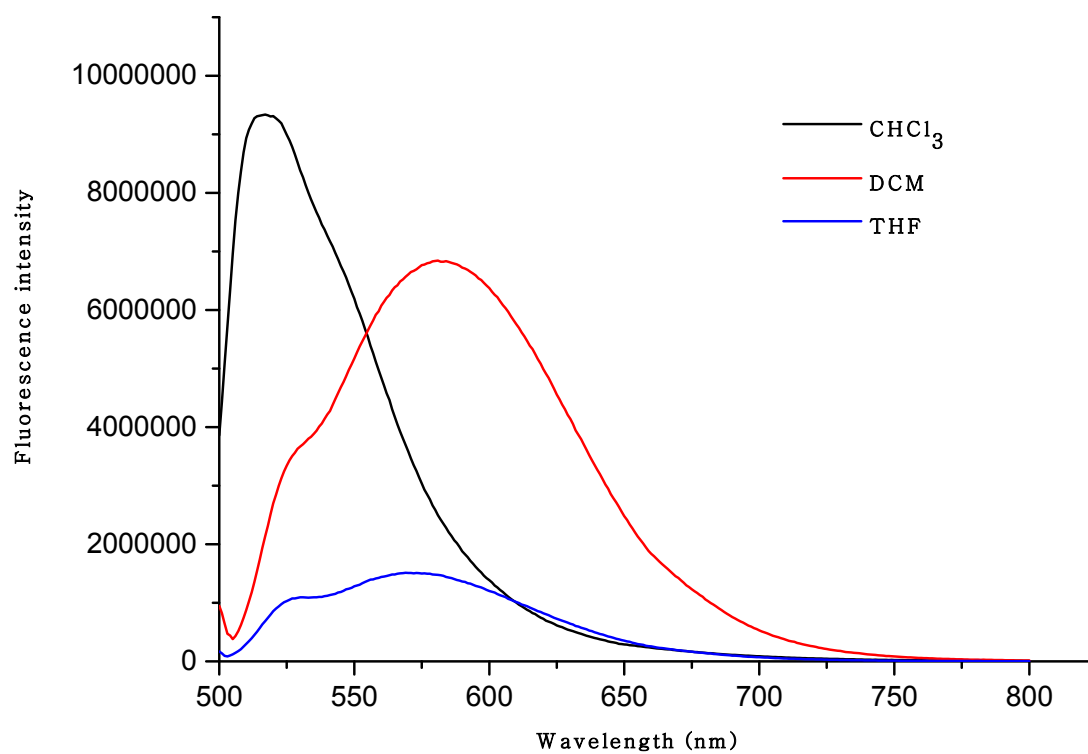

**Figure 47:** Steady state fluorescence spectra of Bis- BODIPY 3 in different solvents.

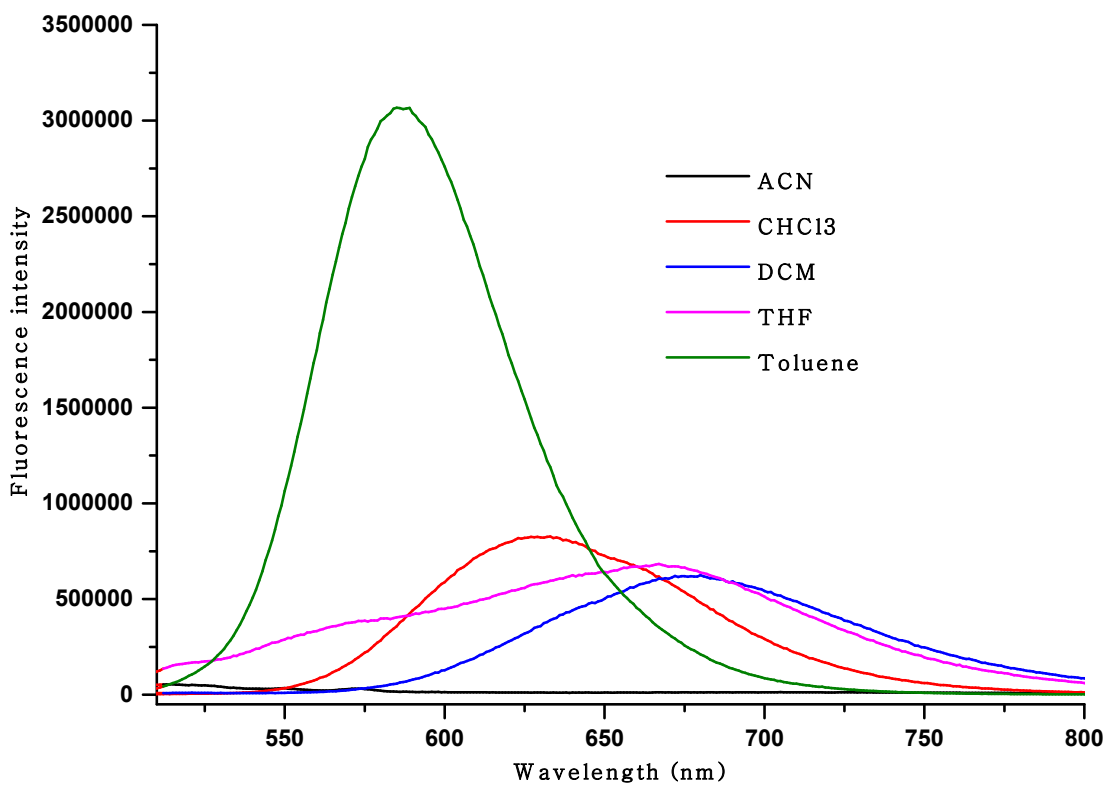

**Figure 48:** Steady state fluorescence spectra of Bis- BODIPY 4 in different solvents.

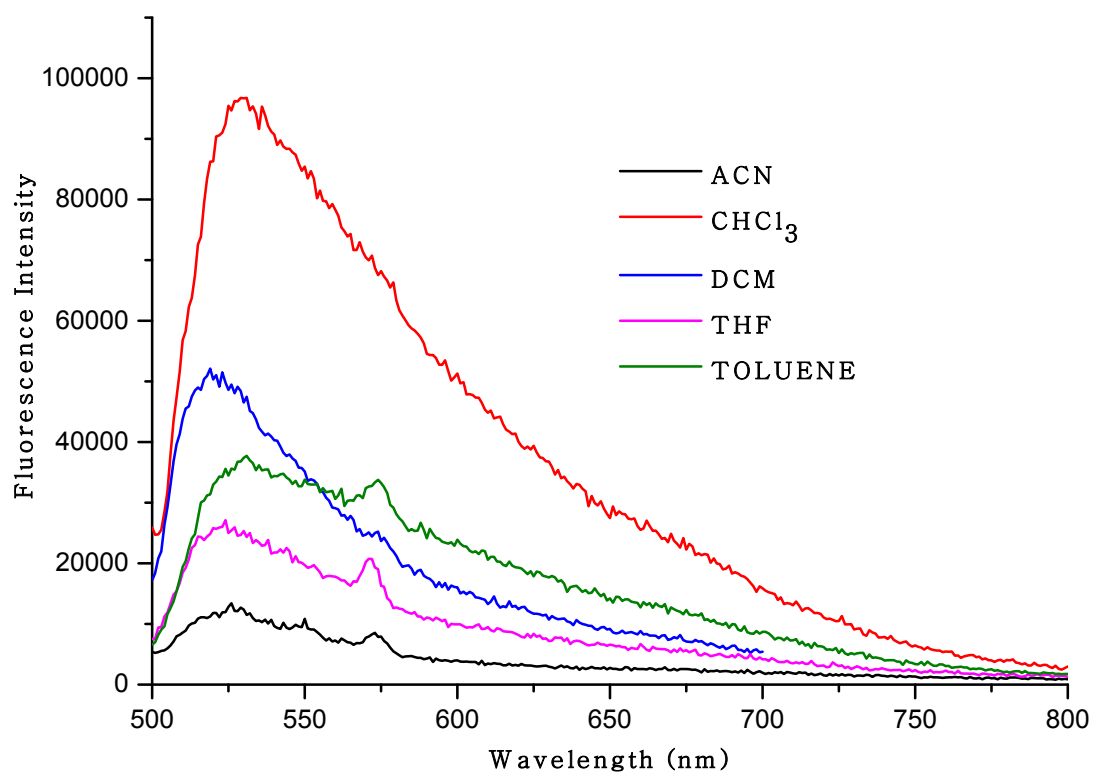

**Figure 49:** Steady state fluorescence spectra of Bis- BODIPY 5 in different solvents.

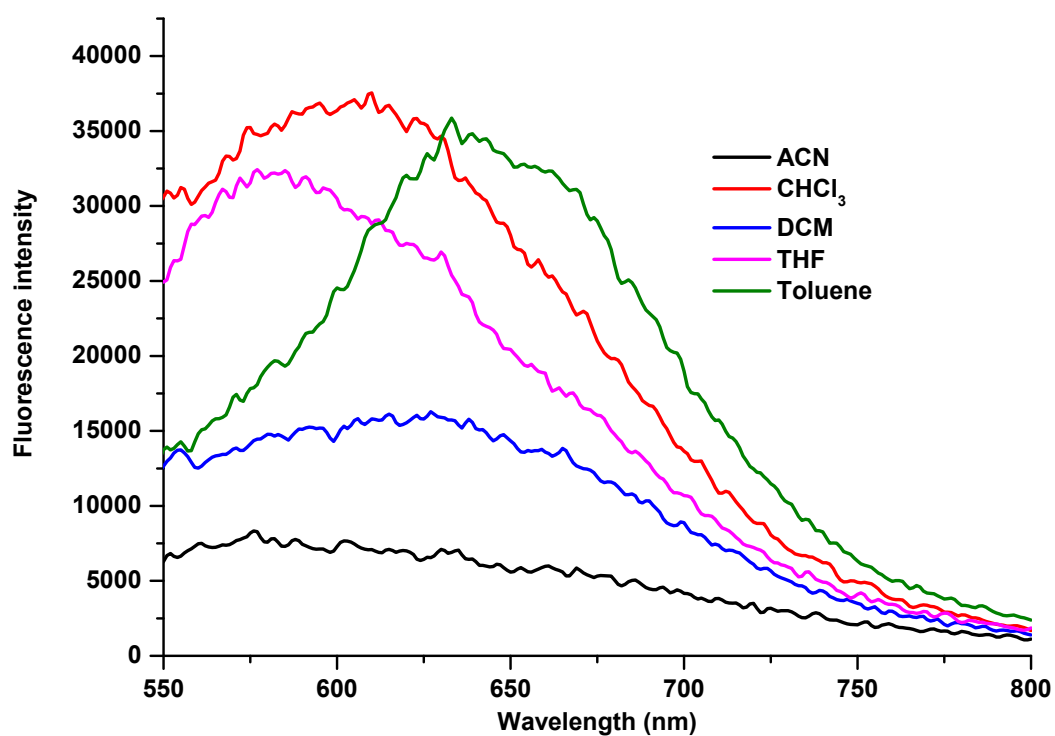

**Figure 50:** Steady state fluorescence spectra of Bis- BODIPY 6 in different solvents.

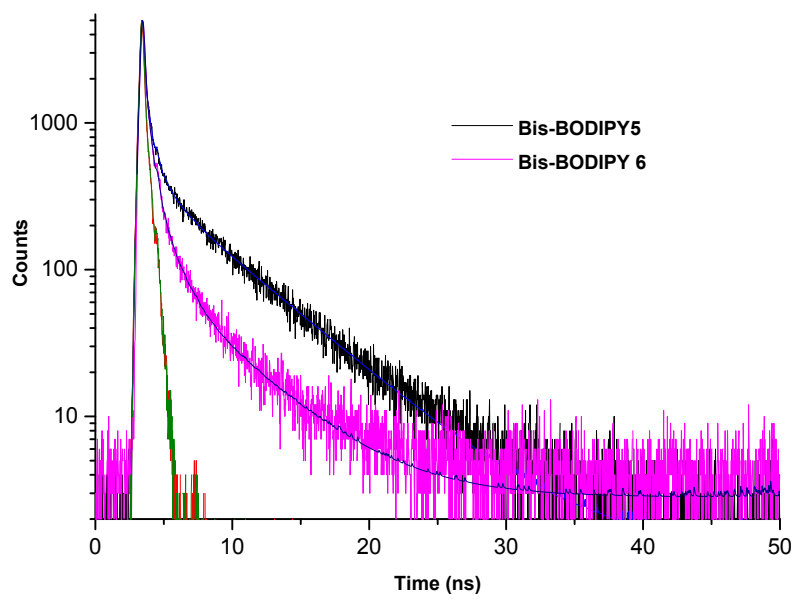

**Figure 51:** TCSPC of Bis- BODIPY **5** and **6** in Dichloromethane.

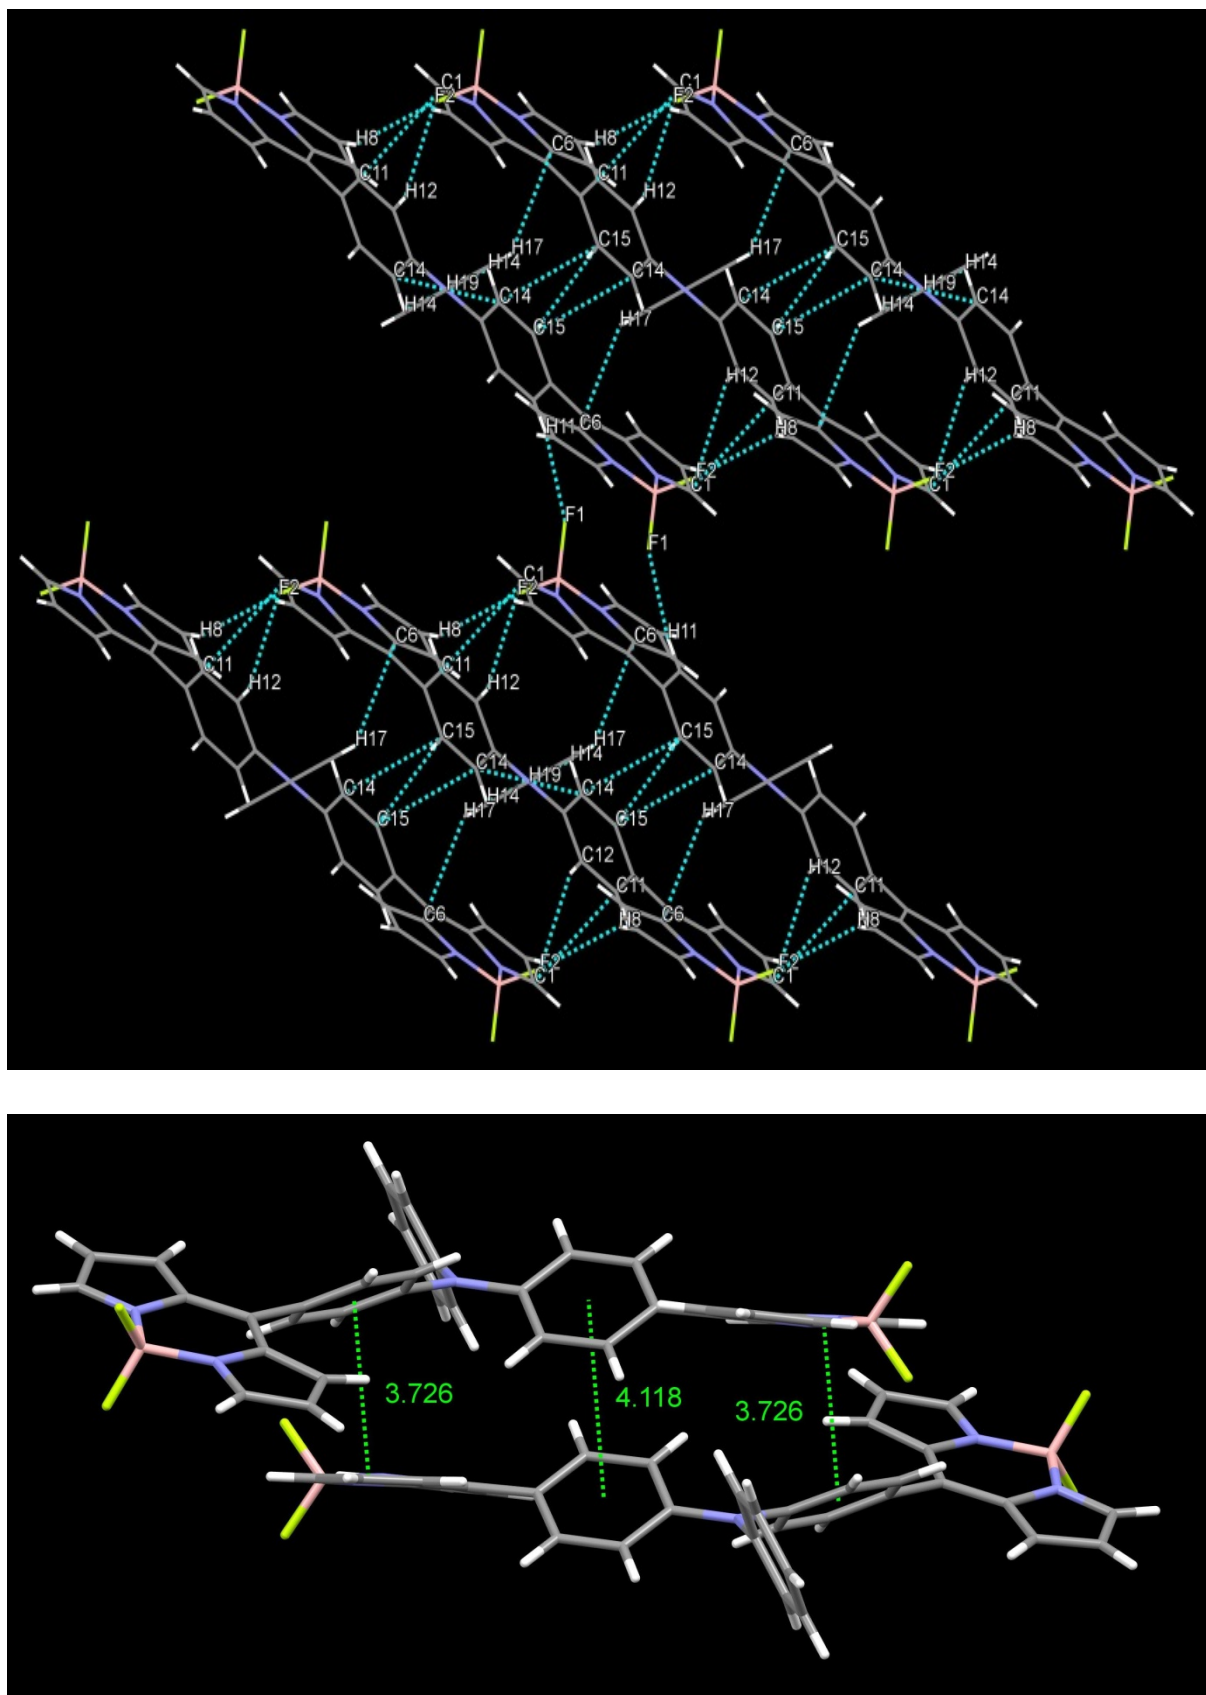

**Figure 52:** Packing diagram (above) and  $\pi$ - $\pi$  stacking diagram (below) of bis -BODIPY 4.

| PARAMETERS           | Bis-BODIPY 1                                                                                                | Bis- BODIPY 2                                                                         | Bis- BODIPY 4                                                                       |
|----------------------|-------------------------------------------------------------------------------------------------------------|---------------------------------------------------------------------------------------|-------------------------------------------------------------------------------------|
| Empirical Formula    | C <sub>24</sub> H <sub>16</sub> B <sub>2</sub> F <sub>4</sub> N <sub>4</sub>                                | C <sub>24</sub> H <sub>16</sub> B <sub>2</sub> F <sub>4</sub> N <sub>4</sub>          | C <sub>36</sub> H <sub>25</sub> B <sub>2</sub> F <sub>4</sub> N <sub>5</sub>        |
| Formula Weight       | 458.03                                                                                                      | 458.03                                                                                | 625.24                                                                              |
| Crystal Color, Habit | red, prism                                                                                                  | orange, block                                                                         | orange, needle                                                                      |
| Crystal System       | monoclinic                                                                                                  | monoclinic                                                                            | monoclinic                                                                          |
| Lattice Type         | Primitive                                                                                                   | I-centered                                                                            | C-centered                                                                          |
| Lattice Parameters   | a = 6.0628(2) Å<br>b = 11.7071(4) Å<br>c = 14.5542(5) Å<br>b = 96.260(7) o<br>V = 1026.86(6) Å <sup>3</sup> | 13.0203(3) Å<br>10.3330(3) Å<br>15.098(3) Å<br>90.00(1) o<br>2031.3(3) Å <sup>3</sup> | 25.107(13) Å<br>9.399(4) Å<br>13.496(7) Å<br>110.599(6) o<br>2981(3) Å <sup>3</sup> |
| Space Group          | P21/n (#14)                                                                                                 | I2/a (#15)                                                                            | C2/c (#15)                                                                          |

**Table 1:** Crystal data refinement parameters of Bis-BODIPYs 1, 2 and 4.

#### DFT calculation data

**Table 2**

#### Bis-BODIPY 1

#### Bond lengths (Å)

| Atom 1 | Atom 2           | Bond length (Å) |       | Atom1 | Atom 2 | Bond length (Å) |       |
|--------|------------------|-----------------|-------|-------|--------|-----------------|-------|
|        |                  | X-RAY           | DFT   |       |        | X-RAY           | DFT   |
| F1     | B1               | 1.396           | 1.381 | F2    | B1     | 1.379           | 1.381 |
| N1     | C1               | 1.344           | 1.340 | N1    | C4     | 1.392           | 1.393 |
| N1     | B1               | 1.552           | 1.569 | N2    | C6     | 1.393           | 1.393 |
| N2     | C9               | 1.3417          | 1.340 | N2    | B1     | 1.554           | 1.569 |
| C1     | C2               | 1.403           | 1.410 | C2    | C3     | 1.380           | 1.388 |
| C3     | C4               | 1.410           | 1.422 | C4    | C5     | 1.398           | 1.405 |
| C5     | C6               | 1.399           | 1.405 | C5    | C11    | 1.484           | 1.483 |
| C6     | C7               | 1.414           | 1.422 | C7    | C8     | 1.379           | 1.387 |
| C8     | C9               | 1.400           | 1.410 | C10   | C11    | 1.398           | 1.404 |
| C10    | C12 <sup>1</sup> | 1.384           | 1.391 | C11   | C12    | 1.3991          | 1.404 |

#### Torsion Angles(°)

(Those having bond angles > 160 or < 20 degrees are excluded.)

| Atoms |    |    |    | Bond angle |         | Atoms |    |    |    | Bond angle |         |
|-------|----|----|----|------------|---------|-------|----|----|----|------------|---------|
| A1    | A2 | A3 | A4 | DFT        | X-RAY   | A1    | A2 | A3 | A4 | DFT        | X-RAY   |
| C1    | N1 | C4 | C3 | -0.35      | -1.96   | C1    | N1 | C4 | C5 | 178.23     | 178.28  |
| C4    | N1 | C1 | C2 | 0.01       | 1.69    | C1    | N1 | B1 | F1 | 58.46      | 58.7    |
| C1    | N1 | B1 | F2 | -64.98     | -62.3   | C1    | N1 | B1 | N2 | 176.89     | 176.80  |
| B1    | N1 | C1 | C2 | -176.68    | -174.09 | C4    | N1 | B1 | F1 | -117.63    | -116.33 |
| C4    | N1 | B1 | F2 | 118.92     | 122.69  | C4    | N1 | B1 | N2 | 0.80       | 1.75    |
| B1    | N1 | C4 | C3 | 176.29     | 173.90  | B1    | N1 | C4 | C5 | -1.57      | -5.9    |
| C6    | N2 | C9 | C8 | 0.01       | 0.34    | C9    | N2 | C6 | C5 | 178.22     | 178.82  |
| C9    | N2 | C6 | C7 | -0.35      | -0.80   | C6    | N2 | B1 | F1 | 118.87     | 121.36  |
| C6    | N2 | B1 | F2 | -117.68    | -118.13 | C6    | N2 | B1 | N1 | 0.75       | 3.10    |

|                  |     |                  |                  |          |         |                  |     |     |                  |          |         |
|------------------|-----|------------------|------------------|----------|---------|------------------|-----|-----|------------------|----------|---------|
| B1               | N2  | C6               | C5               | -1.54    | -3.9    | B1               | N2  | C6  | C7               | 176.31   | 176.50  |
| C9               | N2  | B1               | F1               | -65.02   | -61.85  | C9               | N2  | B1  | F2               | 58.43    | 58.66   |
| C9               | N2  | B1               | N1               | 178.86   | 179.89  | B1               | N2  | C9  | C8               | -176.705 | -176.95 |
| N1               | C1  | C2               | C3               | -0.34    | -0.75   | C1               | C2  | C3  | C4               | -0.55    | -0.48   |
| C2               | C3  | C4               | N1               | 0.57     | 1.51    | C2               | C3  | C4  | C5               | -178.14  | -178.77 |
| N1               | C4  | C5               | C6               | 0.74     | 5.1     | N1               | C4  | C5  | C11              | -179.25  | -173.11 |
| C3               | C4  | C5               | C6               | -176.56  | -174.56 | C3               | C4  | C5  | C11              | 3.43     | 7.2     |
| C4               | C5  | C6               | N2               | -0.74    | -0.5    | C4               | C5  | C6  | C7               | 76.55    | 179.06  |
| C4               | C5  | C11              | C10              | -125.81  | -127.45 | C4               | C5  | C11 | C12              | 54.18    | 54.00   |
| C6               | C5  | C11              | C10              | 54.18    | 54.31   | C6               | C5  | C11 | C12              | -125.81  | -124.25 |
| C11              | C5  | C6               | N2               | 179.25   | 177.77  | C11              | C5  | C6  | C7               | -3.4     | -2.7    |
| N2               | C6  | C7               | C8               | 0.57     | 0.96    | C5               | C6  | C7  | C8               | -178.14  | -178.60 |
| C6               | C7  | C8               | C9               | -0.55    | -0.74   | C7               | C8  | C9  | N2               | 0.34     | 0.26    |
| C11              | C10 | C12 <sup>1</sup> | C11 <sup>1</sup> | -0.00027 | -0.4    | C12 <sup>1</sup> | C10 | C11 | C5               | -180.00  | -178.16 |
| C12 <sup>1</sup> | C10 | C11              | C12              | 0.00053  | 0.4     | C5               | C11 | C12 | C10 <sup>1</sup> | 180.00   | 178.18  |
| C10              | C11 | C12              | C10 <sup>1</sup> | -0.00050 | -0.4    |                  |     |     |                  |          |         |

#### Bis-BODIPY 2

| Atom1 | Atom2            | Bond length (Å) |        | Atom1 | Atom 2 | Bond length(Å) |        |
|-------|------------------|-----------------|--------|-------|--------|----------------|--------|
|       |                  | DFT             | X-RAY  |       |        | DFT            | X-RAY  |
| F1    | B1               | 1.381           | 1.3809 | F2    | B1     | 1.381          | 1.3901 |
| N1    | C1               | 1.34            | 1.337  | N1    | C4     | 1.393          | 1.3947 |
| N1    | B1               | 1.569           | 1.547  | N2    | C6     | 1.394          | 1.3941 |
| N2    | C9               | 1.340           | 1.3497 | N2    | B1     | 1.569          | 1.553  |
| C1    | C2               | 1.41            | 1.402  | C2    | C3     | 1.38           | 1.371  |
| C3    | C4               | 1.421           | 1.416  | C4    | C5     | 1.404          | 1.395  |
| C5    | C6               | 1.405           | 1.404  | C5    | C1     | 1.486          | 1.483  |
| C6    | C7               | 1.422           | 1.408  | C7    | C8     | 1.387          | 1.385  |
| C8    | C9               | 1.410           | 1.385  | C10   | C11    | 1.403          | 1.3941 |
| C10   | C11 <sup>1</sup> | 1.403           | 1.3941 | C11   | C12    | 1.404          | 1.396  |
| C12   | C13              | 1.393           | 1.3847 |       |        |                |        |

#### Bond angles (°)

| A1  | A2  | Bond Angle       |        | A1     | A2  | Bond Angle |                  |        |        |
|-----|-----|------------------|--------|--------|-----|------------|------------------|--------|--------|
|     |     | A3DFT            | X-RAY  |        |     | A3DFT      | X-RAY            |        |        |
| C1  | N1  | C4               | 107.94 | 107.74 | C1  | N1         | B1               | 125.58 | 126.39 |
| C4  | N1  | B1               | 126.42 | 125.52 | C6  | N2         | C9               | 107.93 | 107.39 |
| C6  | N2  | B1               | 126.38 | 125.72 | C9  | N2         | B1               | 125.52 | 126.88 |
| N1  | C1  | C2               | 110.40 | 110.22 | C1  | C2         | C3               | 106.59 | 107.06 |
| C2  | C3  | C4               | 107.23 | 107.40 | N1  | C4         | C3               | 107.81 | 107.54 |
| N1  | C4  | C5               | 121.04 | 120.98 | C3  | C4         | C5               | 131.07 | 131.43 |
| C4  | C5  | C6               | 120.13 | 120.03 | C4  | C5         | C11              | 120.27 | 119.86 |
| C6  | C5  | C11              | 119.59 | 120.07 | N2  | C6         | C5               | 121.02 | 120.74 |
| N2  | C6  | C7               | 107.83 | 107.74 | C5  | C6         | C7               | 131.11 | 131.36 |
| C6  | C7  | C8               | 107.17 | 107.39 | C7  | C8         | C9               | 106.63 | 107.00 |
| N2  | C9  | C8               | 110.41 | 110.48 | C11 | C10        | C11 <sup>1</sup> | 120.89 | 121.09 |
| C5  | C11 | C10              | 120.48 | 119.63 | C5  | C11        | C12              | 120.42 | 121.22 |
| C10 | C11 | C12              | 119.07 | 119.15 | C11 | C12        | C13              | 120.26 | 119.68 |
| C12 | C13 | C12 <sup>1</sup> | 120.37 | 121.23 | F1  | B1         | F2               | 111.71 | 109.42 |
| F1  | B1  | N1               | 110.23 | 110.89 | F1  | B1         | N2               | 109.77 | 110.87 |
| F2  | B1  | N1               | 109.78 | 110.17 | F2  | B1         | N2               | 110.22 | 109.89 |
| N1  | B1  | N2               | 104.88 | 105.54 |     |            |                  |        |        |

#### Torsion Angles(°)

(Those having bond angles > 160 or < 20 degrees are excluded.)

| Atoms            |     |                  |                  | Bond angle |         | Atoms            |     |                  |                  | Bond angle |         |
|------------------|-----|------------------|------------------|------------|---------|------------------|-----|------------------|------------------|------------|---------|
| A1               | A2  | A3               | A4               | DFT        | X-RAY   | A1               | A2  | A3               | A4               | DFT        | X-RAY   |
| C1               | N1  | C4               | C3               | -0.01      | -1.51   | C1               | N1  | C4               | C5               | 177.78     | 176.08  |
| C4               | N1  | C1               | C2               | 0.05       | 0.55    | C1               | N1  | B1               | F1               | -56.78     | -53.31  |
| C1               | N1  | B1               | F2               | 66.69      | 67.98   | C1               | N1  | B1               | N2               | -175.20    | -173.45 |
| B1               | N1  | C1               | C2               | -175.79    | -172.98 | C4               | N1  | B1               | F1               | 121.73     | 134.27  |
| C4               | N1  | B1               | F2               | -114.79    | -104.44 | C4               | N1  | B1               | N2               | 3.62       | 14.14   |
| B1               | N1  | C4               | C3               | 177.25     | 172.08  | B1               | N1  | C4               | C5               | -0.185     | -10.3   |
| C6               | N2  | C9               | C8               | 0.05       | 0.69    | C9               | N2  | C6               | C5               | -177.79    | -176.73 |
| C9               | N2  | C6               | C7               | -0.380     | -0.85   | C6               | N2  | B1               | F1               | -121.78    | -131.29 |
| C6               | N2  | B1               | F2               | 114.74     | 107.62  | C6               | N2  | B1               | N1               | -3.670     | -11.14  |
| B1               | N2  | C6               | C5               | 3.14       | 4.3     | B1               | N2  | C6               | C7               | -177.26    | -179.86 |
| C9               | N2  | B1               | F1               | 56.81      | 49.89   | C9               | N2  | B1               | F2               | -66.66     | -71.20  |
| C9               | N2  | B1               | N1               | 175.22     | 170.03  | B1               | N2  | C9               | C8               | 177.59     | 179.69  |
| N1               | C1  | C2               | C3               | 0.356      | 0.67    | C1               | C2  | C3               | C4               | -0.575     | -1.58   |
| C2               | C3  | C4               | N1               | 0.597      | 1.92    | C2               | C3  | C4               | C5               | -177.60    | -175.32 |
| N1               | C4  | C5               | C6               | 1.26       | 0.8     | N1               | C4  | C5               | C11              | -178.82    | -176.94 |
| C3               | C4  | C5               | C6               | 177.82     | 177.75  | C3               | C4  | C5               | C11              | 2.20       | 0.0     |
| C4               | C5  | C6               | N2               | 1.26       | 2.08    | C4               | C5  | C6               | C7               | -175.49    | -172.68 |
| C4               | C5  | C11              | C10              | 56.22      | 2.01    | C4               | C5  | C11              | C12              | -123.68    | -128.14 |
| C6               | C5  | C11              | C10              | -123.68    | -125.74 | C6               | C5  | C11              | C12              | 56.22      | 54.11   |
| C11              | C5  | C6               | N2               | 179.59     | 179.83  | C11              | C5  | C6               | C7               | 4.40       | 5.1     |
| N2               | C6  | C7               | C8               | 0.59       | 0.69    | C5               | C6  | C7               | C8               | 177.61     | 175.97  |
| C6               | C7  | C8               | C9               | -0.48      | -0.28   | C7               | C8  | C9               | N2               | -0.27      | -0.26   |
| C11              | C10 | C11 <sup>1</sup> | C5 <sup>1</sup>  | -176.91    | -179.73 | C11              | C10 | C11 <sup>1</sup> | C12 <sup>1</sup> | 1.76       | 0.42    |
| C11 <sup>1</sup> | C10 | C11              | C5               | -176.91    | -179.73 | C11 <sup>1</sup> | C10 | C11              | C12              | 1.76       | 0.42    |
| C5               | C11 | C12              | C13              | 178.45     | 179.31  | C10              | C11 | C12              | C13              | -0.23      | -0.84   |
| C11              | C12 | C13              | C12 <sup>1</sup> | 1.29       | 0.42    |                  |     |                  |                  |            |         |

Bis-BODIPY 4

Bond lengths (Å)

| Atom | Atom | Distance |       | Atom | Atom             | Distance |       |
|------|------|----------|-------|------|------------------|----------|-------|
|      |      | DFT      | X-RAY |      |                  | DFT      | X-RAY |
| F1   | B1   | 1.381    | 1.386 | F2   | B1               | 1.383    | 1.389 |
| N1   | C1   | 1.341    | 1.342 | N1   | C4               | 1.394    | 1.396 |
| N1   | B1   | 1.566    | 1.545 | N2   | C6               | 1.394    | 1.398 |
| N2   | C9   | 1.341    | 1.343 | N2   | B1               | 1.566    | 1.550 |
| N3   | C13  | 1.414    | 1.408 | N3   | C13 <sup>1</sup> | 1.415    | 1.408 |
| N3   | C16  | 1.430    | 1.433 | C1   | C2               | 1.408    | 1.400 |
| C2   | C3   | 1.388    | 1.378 | C3   | C4               | 1.421    | 1.421 |
| C4   | C5   | 1.408    | 1.406 | C5   | C6               | 1.408    | 1.412 |
| C5   | C10  | 1.477    | 1.474 | C6   | C7               | 1.421    | 1.416 |
| C7   | C8   | 1.388    | 1.382 | C8   | C9               | 1.408    | 1.391 |
| C10  | C11  | 1.407    | 1.404 | C10  | C15              | 1.406    | 1.402 |
| C11  | C12  | 1.389    | 1.383 | C12  | C13              | 1.405    | 1.395 |
| C13  | C14  | 1.406    | 1.399 | C14  | C15              | 1.389    | 1.381 |
| C16  | C17  | 1.401    | 1.392 | C16  | C17 <sup>1</sup> | 1.401    | 1.392 |
| C17  | C18  | 1.394    | 1.384 | C18  | C19              | 1.396    | 1.385 |

Bond angles (°)

| Atom             | Atom | Atom             | Bond Angle |        | Atom | Atom | Atom | Bond Angle |        |
|------------------|------|------------------|------------|--------|------|------|------|------------|--------|
|                  |      |                  | DFT        | X-RAY  |      |      |      | DFT        | X-RAY  |
| C1               | N1   | C4               | 108.01     | 107.83 | C1   | N1   | B1   | 125.72     | 125.86 |
| C4               | N1   | B1               | 126.21     | 126.27 | C6   | N2   | C9   | 108.01     | 107.78 |
| C6               | N2   | B1               | 126.06     | 125.83 | C9   | N2   | B1   | 125.72     | 125.88 |
| C13              | N3   | C13 <sup>1</sup> | 121.17     | 122.60 | C13  | N3   | C16  | 119.49     | 118.70 |
| C13 <sup>1</sup> | N3   | C16              | 119.32     | 118.70 | N1   | C1   | C2   | 110.36     | 110.42 |
| C1               | C2   | C3               | 106.62     | 106.87 | C2   | C3   | C4   | 107.24     | 107.56 |
| N1               | C4   | C3               | 107.73     | 107.30 | N1   | C4   | C5   | 120.98     | 120.73 |
| C3               | C4   | C5               | 131.25     | 131.96 | C4   | C5   | C6   | 119.80     | 119.92 |



|     |     |                  |        |        |     |     |                  |        |        |
|-----|-----|------------------|--------|--------|-----|-----|------------------|--------|--------|
| C4  | C5  | C10              | 120.34 | 120.54 | C6  | C5  | C10              | 119.86 | 119.52 |
| N2  | C6  | C5               | 120.98 | 120.70 | N2  | C6  | C7               | 107.73 | 107.26 |
| C5  | C6  | C7               | 131.26 | 132.02 | C6  | C7  | C8               | 107.24 | 107.44 |
| C7  | C8  | C9               | 106.62 | 107.1  | N2  | C9  | C8               | 110.36 | 110.42 |
| C5  | C10 | C11              | 120.87 | 120.69 | C5  | C10 | C15              | 121.34 | 121.40 |
| C11 | C10 | C15              | 117.82 | 117.91 | C10 | C11 | C12              | 121.25 | 121.27 |
| C11 | C12 | C13              | 120.61 | 120.22 | N3  | C13 | C12              | 120.49 | 119.89 |
| N3  | C13 | C14              | 121.02 | 121.09 | C12 | C13 | C14              | 118.47 | 119.01 |
| C13 | C14 | C15              | 120.60 | 120.60 | C10 | C15 | C14              | 121.26 | 120.93 |
| N3  | C16 | C17              | 120.20 | 120.06 | N3  | C16 | C17 <sup>1</sup> | 120.20 | 120.06 |
| C17 | C16 | C17 <sup>1</sup> | 119.48 | 119.9  | C16 | C17 | C18              | 120.07 | 120.0  |
| C17 | C18 | C19              | 120.41 | 119.8  | C18 | C19 | C18 <sup>1</sup> | 119.52 | 120.5  |
| F1  | B1  | F2               | 111.60 | 109.53 | F1  | B1  | N1               | 110.19 | 110.12 |
| F1  | B1  | N2               | 109.57 | 109.7  | F2  | B1  | N1               | 110.43 | 111.3  |
| F2  | B1  | N2               | 109.94 | 109.87 | N1  | B1  | N2               | 104.81 | 106.21 |

Torsion Angles(°)

(Those having bond angles > 160 or < 20 degrees are excluded.)

| Atoms            |     | Bond angle       |                  |         |         | Atoms            |     | Bond angle       |                  |         |         |
|------------------|-----|------------------|------------------|---------|---------|------------------|-----|------------------|------------------|---------|---------|
| A1               | A2  | A3               | A4               | DFT     | X-RAY   | A1               | A2  | A3               | A4               | DFT     | X-RAY   |
| C1               | N1  | C4               | C3               | -0.59   | -0.5    | C1               | N1  | C4               | C5               | 176.40  | 179.49  |
| C4               | N1  | C1               | C2               | -0.03   | -0.0    | C1               | N1  | B1               | F1               | -59.49  | -65.1   |
| C1               | N1  | B1               | F2               | 63.88   | 56.6    | C1               | N1  | B1               | N2               | 178.66  | 176.2   |
| B1               | N1  | C1               | C2               | -179.92 | -178.11 | C4               | N1  | B1               | F1               | 108.33  | 117.2   |
| C4               | N1  | B1               | F2               | -128.18 | -121.2  | C4               | N1  | B1               | N2               | -9.46   | -1.6    |
| B1               | N1  | C4               | C3               | 179.33  | 177.60  | B1               | N1  | C4               | C5               | -2.88   | -2.4    |
| C6               | N2  | C9               | C8               | -0.10   | -0.5    | C9               | N2  | C6               | C5               | 179.97  | -178.73 |
| C9               | N2  | C6               | C7               | -0.2    | -0.1    | C6               | N2  | B1               | F1               | 109.58  | -112.9  |
| C6               | N2  | B1               | F2               | 126.9   | 126.6   | C6               | N2  | B1               | N1               | 8.27    | 6.1     |
| B1               | N2  | C6               | C5               | -8.24   | -6.6    | B1               | N2  | C6               | C7               | 171.12  | 172.08  |
| C9               | N2  | B1               | F1               | 60.88   | 57.9    | C9               | N2  | B1               | F2               | -59.49  | -62.6   |
| C9               | N2  | B1               | N1               | 178.66  | 176.9   | B1               | N2  | C9               | C8               | -171.70 | -172.67 |
| C13              | N3  | C13 <sup>1</sup> | C12 <sup>1</sup> | 142.9   | 148.31  | C13              | N3  | C13 <sup>1</sup> | C14 <sup>1</sup> | -37.07  | -32.8   |
| C13 <sup>1</sup> | N3  | C13              | C12              | 143.83  | 148.31  | C13 <sup>1</sup> | N3  | C13              | C14              | -37.07  | -32.8   |
| C13              | N3  | C16              | C17              | 130.32  | 118.32  | C13              | N3  | C16              | C17 <sup>1</sup> | 49.64   | -61.68  |
| C16              | N3  | C13              | C12              | -36.86  | -31.7   | C16              | N3  | C13              | C14              | 142.72  | 147.24  |
| C13 <sup>1</sup> | N3  | C16              | C17              | -49.64  | -61.68  | C13 <sup>1</sup> | N3  | C16              | C17 <sup>1</sup> | 130.32  | 118.32  |
| C16              | N3  | C13 <sup>1</sup> | C12 <sup>1</sup> | -36.86  | -31.7   | C16              | N3  | C13 <sup>1</sup> | C14 <sup>1</sup> | 142.72  | 147.24  |
| N1               | C1  | C2               | C3               | 0.44    | 0.5     | C1               | C2  | C3               | C4               | -0.79   | -0.8    |
| C2               | C3  | C4               | N1               | 0.87    | 0.8     | C2               | C3  | C4               | C5               | -179.8  | -179.2  |
| N1               | C4  | C5               | C6               | 2.02    | 2.6     | N1               | C4  | C5               | C10              | -178.83 | -175.98 |
| C3               | C4  | C5               | C6               | -179.05 | -177.4  | C3               | C4  | C5               | C10              | 6.34    | 4.0     |
| C4               | C5  | C6               | N2               | 2.02    | 1.7     | C4               | C5  | C6               | C7               | -179.05 | -176.6  |
| C4               | C5  | C10              | C11              | 50.97   | 44.6    | C4               | C5  | C10              | C15              | -129.39 | -135.9  |
| C6               | C5  | C10              | C11              | -129.39 | -134.0  | C6               | C5  | C10              | C15              | 50.47   | 45.5    |
| C10              | C5  | C6               | N2               | -178.97 | -179.71 | C10              | C5  | C6               | C7               | 1.81    | 2.0     |
| N2               | C6  | C7               | C8               | 0.87    | 0.7     | C5               | C6  | C7               | C8               | 175.86  | 179.1   |
| C6               | C7  | C8               | C9               | -0.79   | -0.9    | C7               | C8  | C9               | N2               | 0.44    | 0.9     |
| C5               | C10 | C11              | C12              | 179.78  | 177.32  | C5               | C10 | C15              | C14              | -179.25 | -178.51 |
| C11              | C10 | C15              | C14              | 0.77    | 0.9     | C15              | C10 | C11              | C12              | -0.17   | -2.1    |
| C10              | C11 | C12              | C13              | 0.066   | 1.2     | C11              | C12 | C13              | N3               | 179.92  | 179.95  |
| C11              | C12 | C13              | C14              | 0.45    | 1.0     | N3               | C13 | C14              | C15              | 179.32  | 178.87  |
| C12              | C13 | C14              | C15              | -0.23   | -2.2    | C13              | C14 | C15              | C10              | 0.06    | 1.2     |
| N3               | C16 | C17              | C18              | -179.51 | -179.96 | N3               | C16 | C17 <sup>1</sup> | C18 <sup>1</sup> | -179.63 | -179.96 |
| C17              | C16 | C17 <sup>1</sup> | C18 <sup>1</sup> | 0.39    | 0.0     | C17 <sup>1</sup> | C16 | C17              | C18              | 0.45    | 0.0     |
| C16              | C17 | C18              | C19              | -0.84   | -0.1    | C17              | C18 | C19              | C18 <sup>1</sup> | 0.41    | 0.0     |
